# Supplementary material
Source: MDPI journal article supplement (https://www.mdpi.com/2073-4395/8/4/36)
Supplement: s1 [file s1]

## Sheet: FINAL
Marker	chrom	start	end	quality	depth	refAllele	altAllele	varType	num_ref_like_samples	insert legnth	LEFT PRIMER								RIGHT PRIMER
											start	len	tm	gc%	any_th	3'_th	hairpin	seq	start	len	tm	gc%	any_th	3'_th	hairpin	seq
KM_IND_1	chr11	17481564	17481565	2267.36	530	GT	G	DEL	15	201	17481541	25	58.86	40	0.2	0	0	AGTCCATACATCATCTAGGACAAGT	17481741	22	59.77	50	0	0	43.89	CCAAGGGTGAACCAATCTTTCG
KM_IND_2	chr01	23777838	23777840	2260.06	543	TTA	T	DEL	15	134	23777815	25	58.82	40	0	0	0	CCTTGAGAGTTTGGAGAGAATCATT	23777948	22	60.22	50	9.74	9.74	44.86	ACACAGGAAATTCTGGACCCAG
KM_IND_3	chr01	35231110	35231113	1031.89	458	TAAG	T	DEL	16	392	35231087	25	60.73	40	0	0	40.38	GCCAAACGCCTGAAACTAAAAGTTA	35231478	22	59.83	45.45	0	0	0	TCTTCTTGTGGTACTTGTGGCA
KM_IND_4	chr11	17481564	17481565	2267.36	530	GT	G	DEL	15	200	17481542	25	57.47	40	0	0	0	GTCCATACATCATCTAGGACAAGTA	17481741	22	59.77	50	0	0	43.89	CCAAGGGTGAACCAATCTTTCG
KM_IND_5	chr04	21283830	21283831	682.7	416	GA	G	DEL	15	397	21283810	22	60.93	54.55	0	0	38.27	CGTCTGCACAGAGAGAGAGAGA	21284206	22	60.29	45.45	0	0	0	TCACTAAGCCCCGTTCGAAATT
KM_IND_6	chr12	23945226	23945229	4456.24	469	GATT	G	DEL	14	302	23945206	22	59.83	50	24.13	0.72	40.39	CATCTTCAGCACCTGATCTGGA	23945507	22	60.16	50	0	0	44.41	AATCTTCAGGAGATGCTCAGGC
KM_IND_7	chr11	20187141	20187268	2305.56	164	TCCCCTC	T	DEL	13	127	20187121	22	61.35	59.09	0	0	0	TCCCTTGTAGGCTCCCCTCATCT	20187560	22	59.9	45.45	0	0	38.45	TCTCTCACGAGTGGAAAAAGCA
KM_IND_8	chr08	16321300	16321303	1994.01	427	CGCG	C	DEL	15	195	16321280	22	59.07	50	0	0	0	GACATGAAACCATCTCCTCACG	16321475	22	60.42	45.45	0.03	0	45.6	ATGCTACAAGCTGTCGTTCGAT
KM_IND_9	chr03	15418684	15418687	1516.77	538	AAAC	A	DEL	16	107	15418664	22	60.22	50	0	0	0	CCACCTTCAGCAGTACCAGAAA	15418770	22	59.77	45.45	0	0	0	GCATCACCATTTTCTTCAGCCA
KM_IND_10	chr12	12378041	12378043	772.29	536	CAA	C	DEL	16	500	12378021	22	59	45.45	0	0	0	GATCGTGATTGTCTTCTTGCCA	12378520	22	60.16	45.45	0	0	0	CTTGGGCTGTTCGTGTTTTCAA
KM_IND_11	chr08	15976421	15976424	1334	395	CGCA	C	DEL	15	173	15976401	23	59.76	43.48	0	0	33.44	CGCCATTTTTGTTCATACATCGC	15976573	22	60.16	50	0	0	0	CATCTGTTGCCAATGTCTGCTC
KM_IND_12	chr12	3947399	3947402	1230.21	428	TTCC	T	DEL	15	138	3947379	24	59.71	45.83	0	0	0	TCCCTTCTTCCTCTTCTTTCTTCC	3947516	22	59.64	50	2.4	0	0	GAAATGTGGCAGCAGATCAGAG
KM_IND_13	chr01	11071127	11071136	6424.29	394	TCCCGACGAC	T	DEL	15	221	11071108	21	60.8	57.14	0	0	0	CTGCGATCCTACCAGTGCTTC	11071328	22	60.22	50	0	0	0	CTGCTGGTGTGGTCTACTCAAA
KM_IND_14	chr09	3344052	3344054	1496.76	613	AGG	A	DEL	16	217	3344033	22	59.83	54.55	0	0	45.15	GCTGTTACTCTCCTCTTCCAGG	3344249	22	59.64	50	5.06	0	37.63	CAACACAAACTACACCAGTGGG
KM_IND_15	chr08	16321300	16321303	1994.01	427	CGCG	C	DEL	15	196	16321281	22	60.94	50	0	0	0	ACATGAAACCATCTCCTCACGC	16321476	22	60.61	45.45	0	0	45.6	AATGCTACAAGCTGTCGTTCGA
KM_IND_16	chr04	30725061	30725062	1219.57	469	CA	C	DEL	14	128	30725042	22	57.9	40.91	0	0	42	AGTTTCTGTTATGGGCAGACAA	30725169	22	59.9	50	23.91	11.02	0	CCTGGCATGCATAACAGAAAGG
KM_IND_17	chr09	1856132	1856159	2684.92	569	CAGCTGCCAGCAATGGGGTCCCAGCGAT	C	DEL	16	239	1856113	22	59.45	50	0	0	0	CTATGTTGGCCACTAATCGCAG	1856351	22	59.63	45.45	7.99	0	0	TGTTCCTGATTGAGCTGAACCT
KM_IND_18	chr04	21283830	21283831	682.7	416	GA	G	DEL	15	460	21283811	22	58.92	50	0.25	0	38.27	GTCTGCACAGAGAGAGAGAGAA	21284270	22	60.03	50	11.95	0	41.7	GTCGATGGCAATAGCTAGCTCT
KM_IND_19	chr04	21283830	21283831	682.7	416	GA	G	DEL	15	176	21283811	23	59.49	47.83	0.25	0	38.27	GTCTGCACAGAGAGAGAGAGAAA	21284206	22	60.29	45.45	0	0	0	TCACTAAGCCCCGTTCGAAATT
KM_IND_20	chr11	23310209	23310211	348.28	418	GAC	G	DEL	13	103	23310190	23	59.74	43.48	15.36	0	0	TCATTAATGGTTCGAGTGGGACA	23310292	22	60.22	45.45	14.55	0	46.05	GTCATGTGCACAAGCTCAAACA
KM_IND_21	chr12	3947399	3947546	1230.21	428	TTCC	T	DEL	15	147	3947380	25	59.51	44	0	0	0	CCCTTCTTCCTCTTCTTTCTTCCTA	3947526	22	58.98	45.45	0	0	0	ATTAAGGACGGAAATGTGGCAG
KM_IND_22	chr12	19492490	19492505	5408.56	319	CCCTCCGCCGCCCCCT	C	DEL	14	288	19492472	20	61.54	60	0	0	42.27	TTCTTCCCGGACGACTTCCC	19492759	22	59.76	50	0	0	33.59	CTTGGCTAACCCTATCCCCAAA
KM_IND_23	chr08	11065053	11065062	1989.99	323	GCGCCGCCGC	G	DEL	15	290	11065035	20	64.35	60	6.14	0	43.06	TCATGCACGACGGCATTCGC	11065324	22	60.22	54.55	0	0	40.86	GGTGAAGAGATGGGTTATCGGG
KM_IND_24	chr06	13070184	13070215	3275.03	402	CCGCCGCGGCGCTGATGGTGCACGTCGTGGTA	C	DEL	15	486	13070166	20	62.78	60	0	0	0	TGCGAGAAGTTGTACCGGCC	13070651	23	59.94	47.83	0	0	36.5	CTTGTGTTCATACATGTCCTCGC
KM_IND_25	chr10	4055683	4055686	304.77	509	ACGT	A	DEL	16	100	4055665	20	59.97	55	26.01	14	46.54	CGATCAATGGCGTTGTCGAC	4055764	22	59.84	45.45	0	0	0	GCAAGGAAATCAAAGATCGGCA
KM_IND_26	chr11	20349047	20349056	5909.3	335	GACCACCGCA	G	DEL	13	437	20349029	21	59.54	52.38	0	0	0	CATCACACCAACCATGACGAC	20349465	22	60.16	50	5.86	2.61	45.65	ACAACTTCGTACTCGATCGGAC
KM_IND_27	chr12	23945226	23945229	4456.24	469	GATT	G	DEL	14	300	23945208	22	59.16	45.45	24.13	6.99	40.39	TCTTCAGCACCTGATCTGGATT	23945507	22	60.16	50	0	0	44.41	AATCTTCAGGAGATGCTCAGGC
KM_IND_28	chr06	16504386	16504388	833.42	336	CAT	C	DEL	14	111	16504368	22	60.09	45.45	14.21	0	0	GCATGCACTGTTTCAAGGCATA	16504478	22	59.19	45.45	0	0	0	AGATTTTGGTGTCATCCGTGTG
KM_IND_29	chr06	16504386	16504388	833.42	336	CAT	C	DEL	14	115	16504368	22	60.09	45.45	14.21	0	0	GCATGCACTGTTTCAAGGCATA	16504499	22	59.7	45.45	0	0	36.02	GCTTGCCACTGGTTTTGGATAA
KM_IND_30	chr06	16504386	16504388	833.42	336	CAT	C	DEL	14	125	16504368	22	60.09	45.45	14.21	0	0	GCATGCACTGTTTCAAGGCATA	16504499	22	59.7	45.45	0	0	36.02	GCTTGCCACTGGTTTTGGATAA
KM_IND_31	chr04	30725061	30725062	1219.57	469	CA	C	DEL	14	127	30725043	22	57.15	40.91	0	0	42	GTTTCTGTTATGGGCAGACAAA	30725169	22	59.9	50	23.91	11.02	0	CCTGGCATGCATAACAGAAAGG
KM_IND_32	chr07	9344655	9344656	689.78	388	GT	G	DEL	16	497	9344637	22	60.09	45.45	3.37	0	37.59	TCTGCGGTTACAGCGATAGTTT	9345133	22	60.68	50	0	0	0	ATCCAGATGAGTTTGCGAAGGG
KM_IND_33	chr07	9344655	9344656	689.78	388	GT	G	DEL	16	305	9344637	22	60.09	45.45	3.37	0	37.59	TCTGCGGTTACAGCGATAGTTT	9344946	22	60.16	50	15.34	0	0	ACGGAGACTAGACGACGATGTA
KM_IND_34	chr07	9344655	9344656	689.78	388	GT	G	DEL	16	500	9344637	22	60.09	45.45	3.37	0	37.59	TCTGCGGTTACAGCGATAGTTT	9345134	22	59.39	50	0	0	0	GATCCAGATGAGTTTGCGAAGG
KM_IND_35	chr12	12378041	12378043	772.29	536	CAA	C	DEL	16	500	12378023	22	58.79	40.91	0	0	0	TCGTGATTGTCTTCTTGCCAAA	12378522	22	60.16	45.45	0	0	0	AACTTGGGCTGTTCGTGTTTTC
KM_IND_36	chr12	16145547	16145550	948.76	622	GCAA	G	DEL	16	162	16145529	22	58.34	40.91	5.11	0	46.3	CAATTGGTGCTAATGTTGGCAA	16145690	22	59.63	45.45	0	0	32.3	TTGCAATGAAGTCCTCCACTCT
KM_IND_37	chr09	1856132	1856159	2684.92	569	CAGCTGCCAGCAATGGGGTCCCAGCGAT	C	DEL	16	238	1856114	22	61.32	50	0	0	0	TATGTTGGCCACTAATCGCAGC	1856351	22	59.63	45.45	7.99	0	0	TGTTCCTGATTGAGCTGAACCT
KM_IND_38	chr09	3344052	3344054	1496.76	613	AGG	A	DEL	16	216	3344034	22	59.24	54.55	0	0	43.67	CTGTTACTCTCCTCTTCCAGGG	3344249	22	59.64	50	5.06	0	37.63	CAACACAAACTACACCAGTGGG
KM_IND_39	chr03	15418684	15418687	1516.77	538	AAAC	A	DEL	16	422	15418666	23	60.12	43.48	0	0	0	ACCTTCAGCAGTACCAGAAAACA	15419087	22	59.83	45.45	10.87	10.87	0	TGGATCAAGCTAGCGAACATGA
KM_IND_40	chr04	21283830	21283831	682.7	416	GA	G	DEL	15	458	21283812	24	59.41	41.67	0	0	32.82	TCTGCACAGAGAGAGAGAGAAAAA	21284270	22	60.03	50	11.95	0	41.7	GTCGATGGCAATAGCTAGCTCT
KM_IND_41	chr12	23945226	23945229	4456.24	469	GATT	G	DEL	14	300	23945208	24	59.34	41.67	2.69	0	40.39	TCTTCAGCACCTGATCTGGATTAT	23945507	22	60.16	50	0	0	44.41	AATCTTCAGGAGATGCTCAGGC
KM_IND_42	chr11	20349047	20349056	5909.3	335	GACCACCGCA	G	DEL	13	436	20349030	21	60.61	52.38	0	0	0	ATCACACCAACCATGACGACC	20349465	22	60.16	50	5.86	2.61	45.65	ACAACTTCGTACTCGATCGGAC
KM_IND_43	chr08	16321300	16321303	1994.01	427	CGCG	C	DEL	15	197	16321283	21	60.74	52.38	3.53	3.53	0	ATGAAACCATCTCCTCACGCG	16321479	22	59.52	45.45	0	0	45.6	GGAAATGCTACAAGCTGTCGTT
KM_IND_44	chr11	9248149	9248152	1536.51	549	GTAC	G	DEL	15	475	9248132	22	59.64	50	0	0	34.35	GCCTAGAGCCATCGAAAGTACT	9248606	22	60.42	54.55	0	0	44.91	CTCGACCACTTATTTGAGGGGG
KM_IND_45	chr11	9248149	9248152	1536.51	549	GTAC	G	DEL	15	475	9248132	23	59.43	47.83	0	0	34.35	GCCTAGAGCCATCGAAAGTACTA	9248606	22	60.42	54.55	0	0	44.91	CTCGACCACTTATTTGAGGGGG
KM_IND_46	chr07	10757987	10757988	1029.84	576	TG	T	DEL	16	363	10757971	21	59.58	57.14	0	0	0	CAGGGAGGGATGGTATTGTCC	10758333	22	60.1	50	0	0	0	CCTCCAATGCTTGCTGTGTTAC
KM_IND_47	chr01	23788331	23788337	2852.55	321	GTATCTT	G	DEL	15	497	23788315	22	60.09	50	0	0	0	CCCTGAGGCGTTTGAAGTATCT	23788811	22	59.83	54.55	0	0	32.07	CTCCACTTCGAGGGTTCTAAGG
KM_IND_48	chr05	3729127	3729129	4073.27	495	TGA	T	DEL	15	226	3729111	22	59.44	45.45	8.36	0	44.85	CCATCACTGGCAATTGTGAGTT	3729336	22	60.09	50	0	0	34.95	CACTCCCGAAAGATGAGAAGCT
KM_IND_49	chr08	17828028	17828049	2894.74	456	TGCTGCTGTTGCTGTTGAAATA	T	DEL	15	455	17828012	22	60.35	45.45	9.23	9.23	35.8	TTGCTGCTGAAATAGTTGCTGC	17828466	22	60.09	45.45	23.93	3.69	32.41	AGGTACAACAGCTGAACCAACA
KM_IND_50	chr04	31401160	31401170	3978.14	491	GCAGGCAGCAA	G	DEL	14	103	31401144	22	60.48	45.45	0	0	0	ATGGTTTGACAAAAGTGCAGGC	31401246	22	60.16	50	0	0	0	CTCCATCATCTCCAGCTTCGTT
KM_IND_51	chr05	24308586	24308598	2512.98	458	ATGGTGGTGGCAC	A	DEL	15	320	24308570	22	60.23	50	0	0	0	AGTTCAGGTTGGGGTAATGGTG	24308889	22	59.7	45.45	0.62	0	0	AAACAGAGCGTGAATCACCCTA
KM_IND_52	chr06	16442341	16442343	2181.76	601	TCA	T	DEL	14	289	16442325	25	58.27	40	0.05	0	39.39	CTCATTGATTTGATCATCACACTCC	16442613	22	59.77	45.45	14.63	0	40.89	GGCATGACATGTTGGCTACAAA
KM_IND_53	chr01	11071127	11071136	6424.29	394	TCCCGACGAC	T	DEL	15	182	11071112	20	59.89	60	0	0	0	GATCCTACCAGTGCTTCCCG	11071293	22	59.83	45.45	0.87	0	30.42	CAACCTTTGTTCAGTGTTGCCT
KM_IND_54	chr01	11071127	11071136	6424.29	394	TCCCGACGAC	T	DEL	15	182	11071112	21	61.3	57.14	0	0	0	GATCCTACCAGTGCTTCCCGA	11071293	22	59.83	45.45	0.87	0	30.42	CAACCTTTGTTCAGTGTTGCCT
KM_IND_55	chr04	23537500	23537520	4645.01	501	AAGAACCCTAGCATCAGTTGC	A	DEL	15	439	23537485	22	60.62	50	0	0	39.62	AAGCATGGCTGACCTAAGAACC	23537923	22	59.91	50	33.12	4.9	46.48	ACGTGACACGAGAGGTATTACG
KM_IND_56	chr08	27088051	27088053	2411.69	572	GCT	G	DEL	14	401	27088036	22	59.83	45.45	11.02	0	0	ATTGCAATACCTGTCGCTCTCT	27088439	22	60.03	50	9.46	0	0	CACCGGAAAACTGATTTGACCC
KM_IND_57	chr11	8460183	8460185	1201.96	539	AGT	A	DEL	16	353	8460168	23	59.1	43.48	0	0	41.23	ACCAACTGTATTGAGAGTGAGGT	8460520	22	59.57	50	0.25	0	39.06	TCACAGTCGACTACCATTAGGC
KM_IND_58	chr11	20349047	20349056	5909.3	335	GACCACCGCA	G	DEL	13	433	20349033	20	60.53	55	0	0	0	ACACCAACCATGACGACCAC	20349465	22	60.16	50	5.86	2.61	45.65	ACAACTTCGTACTCGATCGGAC
KM_IND_59	chr08	16321300	16321303	1994.01	427	CGCG	C	DEL	15	191	16321286	20	63.13	60	0	0	0	AAACCATCTCCTCACGCGGC	16321476	22	60.61	45.45	0	0	45.6	AATGCTACAAGCTGTCGTTCGA
KM_IND_60	chr07	11294062	11294063	279.36	504	GC	G	DEL	16	141	11294048	20	60.4	55	34.82	34.82	38.51	AAGCACTACCCATGGCCATG	11294188	22	59.96	50	8.16	0	43.76	TCTTCTAGGGAGAGCACCTCAA
KM_IND_61	chr07	11294062	11294063	279.36	504	GC	G	DEL	16	488	11294048	20	60.4	55	34.82	34.82	38.51	AAGCACTACCCATGGCCATG	11294535	22	60.16	45.45	0	0	42.24	TGTTACATCCCGTGTGTTGGAA
KM_IND_62	chr09	1856132	1856159	2684.92	569	CAGCTGCCAGCAATGGGGTCCCAGCGAT	C	DEL	16	240	1856118	20	61.03	55	10.11	10.11	0	TTGGCCACTAATCGCAGCTG	1856356	22	60.09	50	0	0	46.98	TAGGCTGTTCCTGATTGAGCTG
KM_IND_63	chr08	10900108	10900111	1293.61	374	GGTT	G	DEL	15	454	10900094	21	60.13	52.38	0	0	35.33	CTTCCTCCTTGTGGGGTTGTT	10900547	21	60.62	57.14	0	0	31.76	GTAGTTGAGGAGGCCTGGGTA
KM_IND_64	chr06	16504386	16504388	833.42	336	CAT	C	DEL	14	107	16504372	22	59.71	45.45	0	0	0	GCACTGTTTCAAGGCATACACA	16504478	22	59.19	45.45	0	0	0	AGATTTTGGTGTCATCCGTGTG
KM_IND_65	chr03	19176979	19176980	865.92	591	AT	A	DEL	16	387	19176965	22	59.84	50	15.62	3.86	36.56	CTTTGGCAGAGAAGATTGCCTG	19177354	22	59.96	45.45	0	0	46.27	AATGCAGTAACAGCAAGAGGGA
KM_IND_66	chr03	20317848	20317851	1186.76	566	AAGG	A	DEL	16	165	20317834	22	59.9	50	0	0	0	TAGACGCTGTTATCAAGGAGGC	20317998	22	59.71	45.45	5.87	0	40.55	GCAAACTTTTGAGCGTCCTGTA
KM_IND_67	chr08	13968728	13968731	2113.98	607	CAAG	C	DEL	15	373	13968714	25	58.34	40	4.09	2.55	40.68	GAGTTCTTCATGTACAAGAAACCAC	13969086	22	59.44	45.45	0	0	39.48	TGAGGTAGATTCGCAAGTCACA
KM_IND_68	chr11	20187141	20187147	2305.56	164	TCCCCTC	T	DEL	13	421	20187128	20	60.4	60	0	0	0	TCATCCACCTCCATCCCCTC	20187548	22	59.97	45.45	0	0	45.62	GGAAAAAGCAAAACAAGGTGCG
KM_IND_69	chr11	20187141	20187147	2305.56	164	TCCCCTC	T	DEL	13	433	20187128	20	60.4	60	0	0	0	TCATCCACCTCCATCCCCTC	20187560	22	59.9	45.45	0	0	38.45	TCTCTCACGAGTGGAAAAAGCA
KM_IND_70	chr07	9344655	9344656	689.78	388	GT	G	DEL	16	308	9344642	22	60.74	54.55	0	0	39.35	GGTTACAGCGATAGTTTCCCCC	9344949	22	60.68	50	15.34	3.69	0	TTGACGGAGACTAGACGACGAT
KM_IND_71	chr12	16145547	16145550	948.76	622	GCAA	G	DEL	16	162	16145534	24	59.9	41.67	5.11	0	46.3	GGTGCTAATGTTGGCAATAATGGA	16145694	22	60.16	45.45	0	0	0	AACCTTGCAATGAAGTCCTCCA
KM_IND_72	chr08	27072538	27072541	2087.6	325	CGAT	C	DEL	15	171	27072526	21	60.2	52.38	0	0	42.66	CCATGATCACCACGATGACGA	27072696	22	59.96	45.45	0	0	0	ATAGAGCAGAGCACCAACCAAA
KM_IND_73	chr02	18661962	18661978	4347.69	187	GGGGAGAGAGAGAGAGA	G	DEL	13	122	18661950	22	61.22	59.09	0	0	0	GAAGAAGGGAAGGGGGAGAGAG	18662071	22	60.49	50	0	0	0	AACAACCCCTCCAAAATCCTCC
KM_IND_74	chr12	19200455	19200457	1969.01	437	GGT	G	DEL	14	318	19200443	22	60.16	45.45	0	0	37.78	AAACCCCATAAAGGTGTGTCGT	19200760	22	60.09	45.45	0	0	0	ACCTCCACCCAAATTCCCTTTT
KM_IND_75	chr06	20166956	20166974	4092.61	503	TGCAATGTGTGCTAGGATG	T	DEL	14	487	20166944	22	59.7	40.91	17.8	9.82	38.12	TGCTAGTTTGCATGCAATGTGT	20167430	22	59.9	50	4.57	0	36.86	GTGCTAGGTTACACGGAGCATA
KM_IND_76	chr04	3469731	3469734	1328.79	548	GAGA	G	DEL	16	432	3469719	22	60.29	54.55	0	0	0	GTGGAGGAGGAGGAGAAGAAGA	3470150	22	60.1	45.45	0	0	43.62	TTTGTTCTCCATGCATCGCAAG
KM_IND_77	chr06	2804479	2804480	895.8	448	AC	A	DEL	16	208	2804467	22	60.29	50	0	0	0	ATTACCTTAGCAACCCCACACC	2804674	22	60.49	50	0	0	0	TTGGTTACTGGTCTTTGGCCTC
KM_IND_78	chr09	1281230	1281233	1174.48	551	CTGT	C	DEL	16	474	1281218	22	60.03	45.45	1.92	0	0	AGTGGGTTTGAACTGTTGTCCT	1281692	22	60.42	50	24.39	5.25	44.91	GCAAGCAACTCCTCGAGGAATA
KM_IND_79	chr02	18551408	18551409	3433.55	554	CT	C	DEL	13	150	18551396	23	59.99	43.48	0	0	0	TGGGCTTAATGTCTTGCTTTGTG	18551545	22	59.83	40.91	0	0	43.71	AACCCACACAATTGCCACAATT
KM_IND_80	chr08	13739716	13739888	3269.98	463	CGCAA	C	DEL	15	172	13739705	19	59.94	57.89	7.93	2.17	43.96	CAGATGTGATGCGCAAGGC	13740176	22	60.23	45.45	3.35	0	0	TCATGGATTCCTGGTGCAAGTT
KM_IND_81	chr07	44290	44293	1583.72	395	ACTT	A	DEL	14	434	44279	22	59.84	54.55	0	0	0	CCACCTCGACTACTTCTTCTGG	44712	22	60.29	50	7.02	2.78	32.34	GTGGGTTCCAGATTCTGTCGAA
KM_IND_82	chr10	2241141	2241142	822.76	531	GC	G	DEL	16	293	2241130	22	58.73	40.91	0.1	0	38.41	GCATCTGCATGGCAATTTTCTT	2241422	22	59.89	45.45	0	0	0	ACTCTCTTGGCAGGGAACATTT
KM_IND_83	chr07	13103316	13103319	793.79	563	AAAG	A	DEL	16	213	13103305	22	60.1	50	0	0	0	CATCGGCAACCAAAGAAGAAGG	13103517	22	59.71	50	0	0	36.46	GTGTCAGAAAACCAAGCCTGAG
KM_IND_84	chr07	13103316	13103319	793.79	563	AAAG	A	DEL	16	204	13103305	22	60.1	50	0	0	0	CATCGGCAACCAAAGAAGAAGG	13103516	22	59.83	45.45	0	0	36.46	TGTCAGAAAACCAAGCCTGAGA
KM_IND_85	chr01	18366289	18366290	1038.77	585	TG	T	DEL	16	339	18366278	22	61.52	50	0	0	41.47	CTTCTGGTGCTTGGCAATCGAT	18366617	22	60.03	45.45	0	0	0	TGCCAACTATGTGCTTGCTCTA
KM_IND_86	chr03	15418684	15418687	1516.77	538	AAAC	A	DEL	16	208	15418673	23	59.75	43.48	0	0	0	GCAGTACCAGAAAACAATGCTGA	15418879	22	59.96	54.55	0	0	0	GGTCTTCTCCTCCATAGCCATG
KM_IND_87	chr08	16321126	16321129	2895.26	376	ATTC	A	DEL	12	360	16321116	20	60.18	55	12.58	0	38.28	TCGACGGCGGATTCTTCTTC	16321475	22	60.42	45.45	0.03	0	45.6	ATGCTACAAGCTGTCGTTCGAT
KM_IND_88	chr02	15134347	15134350	4711.44	446	CCTT	C	DEL	14	196	15134337	21	60.34	57.14	0	0	0	GACACCGTCTCCTTCTTCCAC	15134532	22	59.97	45.45	0	0	0	CTTTGTTGCCGAGACACAATGT
KM_IND_89	chr05	25036391	25036419	2414.36	434	GAAGTTGTAGGTGCCACCGGTGCCGCAGC	G	DEL	16	171	25036381	22	59.9	45.45	0	0	0	AGCTGACGTTGAAGTTGTAGGT	25036551	22	60.22	45.45	0	0	34.93	TGTGCTTTCGTTCTCAAACACG
KM_IND_90	chr08	10723406	10723407	2125.99	537	GC	G	DEL	15	187	10723397	22	60.94	54.55	0	0	0	CAATCTCCTGCCACTCCCTTTC	10723583	22	59.96	45.45	0	0	0	AATTAGCAGAGTTCCTTGGGCA
KM_IND_91	chr07	10757987	10757988	1029.84	576	TG	T	DEL	16	391	10757978	25	58.87	40	0	0	35.14	GGATGGTATTGTCCCAAAAGTATCA	10758368	22	60.03	45.45	0	0	0	AGCGAAAAGGGTATTTGTGTGC
KM_IND_92	chr07	12848261	12848264	548.78	453	AGAC	A	DEL	16	205	12848253	21	59.87	57.14	0	0	0	GAGGAGGAAGACGACGAAGAC	12848457	22	60.29	50	0	0	46.31	ATAAACCTCGCTACCCGATTCG
KM_IND_93	chr02	18480229	18480232	4698.3	463	GTGC	G	DEL	15	303	18480221	22	60.86	50	0	0	41.98	TACTTTTGGTGCGACTACGTGG	18480513	22	60.42	54.55	0	0	0	GTTCCAAGATCACCGAGGAGAC
KM_IND_94	chr02	18480229	18480232	4698.3	463	GTGC	G	DEL	15	294	18480221	22	60.86	50	0	0	41.98	TACTTTTGGTGCGACTACGTGG	18480514	21	60.13	57.14	0	0	0	GGTTCCAAGATCACCGAGGAG
KM_IND_95	chr04	11455596	11455599	2212.69	450	TGGA	T	DEL	14	106	11455588	22	60.03	50	0	0	0	TCAGGCATTGGAGGAGTTCTTC	11455694	22	59.32	45.45	0	0	0	TGATTCAGAATAACACAGCGGC
KM_IND_96	chr06	21280864	21280865	1673.57	529	CT	C	DEL	14	328	21280856	22	60.03	45.45	0	0	38.95	AGATTCCGCTTCTCTTGCAGAA	21281183	22	59.83	50	0	0	0	CCACCACTCCCGATTAGATTGT
KM_IND_97	chr12	16168390	16168393	390.36	569	GGAA	G	DEL	16	192	16168382	23	59.02	43.48	0	0	0	AGAAAGGAGGAAGAAGAAGGTGT	16168561	22	60.16	50	0	0	0	CTCCATGTTGAACCTTGCGATG
KM_IND_98	chr12	16168390	16168393	390.36	569	GGAA	G	DEL	16	170	16168382	23	59.02	43.48	0	0	0	AGAAAGGAGGAAGAAGAAGGTGT	16168551	22	60.29	45.45	4.71	2.49	0	AACCTTGCGATGAATTCCTCCA
KM_IND_99	chr08	15976421	15976424	1334	395	CGCA	C	DEL	15	161	15976413	25	59.58	40	21.06	2.64	43.63	TCATACATCGCAGAGTATATGCTCA	15976573	22	60.16	50	0	0	0	CATCTGTTGCCAATGTCTGCTC
KM_IND_100	chr09	3344052	3344054	1496.76	613	AGG	A	DEL	16	370	3344045	20	59.96	60	0	0	0	CTCTTCCAGGGGTCAGGGTA	3344414	22	60.29	45.45	0	0	0	ACCAATGCCTAATGTGTCAGCT
KM_IND_101	chr12	25216406	25216407	2354.21	611	CT	C	DEL	15	288	25216399	22	60.09	50	0	0	0	CAGTTATCTTGAACCTCCGCCT	25216686	22	59.96	45.45	17	10.36	41.55	AGCCTGATCGTCATGCATGTAT
KM_IND_102	chr06	28753513	28753536	6104.81	455	GCAAGCTACCCCTGTCCGCAAACT	G	DEL	15	267	28753506	22	59.96	45.45	0	0	0	TAATGTTGCAAGCTACCCCTGT	28753772	22	59.9	45.45	10.09	0	0	CCAACGAGATGCATGCTGAATT
KM_IND_103	chr01	34718881	34718884	3416.46	573	TTCC	T	DEL	12	262	34718874	22	59.45	50	0	0	41.25	GCACAACTTCCTCCTCAAGTTC	34719134	22	60.03	45.45	0	0	0	ATCCTGCTGCACAAACCAAATC
KM_IND_104	chr11	15735413	15735435	15463.3	560	GGATCCATAACAATGAAGCGACA	G	DEL	15	356	15735407	20	59.89	55	11.75	0	0	GCCCCGGGATCCATAACAAT	15735762	22	60.29	50	0	0	0	CACTTTGCTACTGGTGGATGGA
KM_IND_105	chr12	10049553	10049556	1549.76	443	GTTC	G	DEL	16	474	10049547	20	63.57	60	0	0	0	TCGTTGGTTCGGGCGTTGTC	10050020	22	60.09	54.55	0	0	44.14	CCTTTGCTACCAGAGGAAGGAG
KM_IND_106	chr10	2196962	2196968	939.81	320	TTCCGAC	T	DEL	16	302	2196956	21	60.53	57.14	0	0	45.5	GTTCGATTCCGACTCCGACTC	2197257	22	60.29	50	0	0	0	TCACTCGGAATGACAAACCCTC
KM_IND_107	chr11	22611322	22611336	5703.98	499	AAGTTCCAAATGCCC	A	DEL	15	386	22611316	22	59.11	45.45	0	0	0	CTCTTGAAGTTCCAAATGCCCA	22611701	22	59.96	50	0	0	38.94	GCGCTCTGGGATAATCCTAACA
KM_IND_108	chr08	10624182	10624183	2866.06	646	CA	C	DEL	15	154	10624176	22	58.57	40.91	16.72	0	40.23	ATTTGACAGCATTTGAGGCTCT	10624329	22	59.84	45.45	8.12	8.12	44.29	TTCTTCGTGGTGATCGAATCGA
KM_IND_109	chr11	23409097	23409105	1991.63	335	CTGAAACCG	C	DEL	12	345	23409091	22	60.03	50	0	0	42.45	GAGTCACTGAAACCGTGAAACG	23409435	22	60.43	50	15.81	0	35.52	TCCTCTTGAGGGAGACAACTGT
KM_IND_110	chr11	23409097	23409105	1991.63	335	CTGAAACCG	C	DEL	12	347	23409091	22	60.03	50	0	0	42.45	GAGTCACTGAAACCGTGAAACG	23409436	22	60.03	54.55	8.33	0	35.52	GTCCTCTTGAGGGAGACAACTG
KM_IND_111	chr11	23409097	23409105	1991.63	335	CTGAAACCG	C	DEL	12	481	23409091	22	60.03	50	0	0	42.45	GAGTCACTGAAACCGTGAAACG	23409573	22	60.03	50	0	0	0	CACCATTTCTGTTTGCTGGGAG
KM_IND_112	chr07	21694894	21694897	841.77	445	AGAG	A	DEL	16	458	21694888	22	63.53	59.09	0	0	33.4	CGAGCGAGAGGAGGAGGCTTTA	21695345	22	59.89	50	4.28	3.96	41.33	TCTCCATATGGACACATGGCAG
KM_IND_113	chr11	18338218	18338219	1435.91	588	CA	C	DEL	16	410	18338212	22	59.77	45.45	0	0	0	ACTCCGCAAAAATGGTGATTCC	18338621	22	60.16	45.45	0	0	0	GACATGTTGTTTGGCACCCTTT
KM_IND_114	chr11	17481322	17481323	1078.77	572	CT	C	DEL	16	309	17481316	22	60.16	50	0	0	0	GCCAATCTTATCCAGGTCTGCT	17481624	22	59.76	50	12.59	0	46.3	TCAGAACTGGCTGATCTTCAGG
KM_IND_115	chr05	20521083	20521084	1319.76	557	TC	T	DEL	16	117	20521077	25	58.21	40	2.15	0	0	TATGCATCGTATATAGCTCAGACAC	20521193	22	59.9	50	0	0	0	GCAAGTCTGATGTAATGTGGGC
KM_IND_116	chr11	15735413	15735435	15463.3	560	GGATCCATAACAATGAAGCGACA	G	DEL	15	359	15735408	22	60.16	50	26.32	0	0	CCCCGGGATCCATAACAATGAA	15735766	22	59.7	45.45	0	0	45.6	TATGCACTTTGCTACTGGTGGA
KM_IND_117	chr08	17828028	17828049	2894.74	456	TGCTGCTGTTGCTGTTGAAATA	T	DEL	15	185	17828023	22	60.03	45.45	0	0	39.81	ATAGTTGCTGCTGTTGCTGTTG	17828207	22	60.09	45.45	0	0	0	CCAGCAACAGCAGCAAATGTAT
KM_IND_118	chr02	18661962	18661978	4347.69	187	GGGGAGAGAGAGAGAGA	G	DEL	13	459	18661958	22	60.16	59.09	0	0	0	GAAGGGGGAGAGAGAGAGAGAG	18662416	22	59.25	45.45	2.88	1.78	32.72	TCTCCTGATTCGTTCATGTCGA
KM_IND_119	chr02	18661962	18661978	4347.69	187	GGGGAGAGAGAGAGAGA	G	DEL	13	112	18661958	22	60.16	59.09	0	0	0	GAAGGGGGAGAGAGAGAGAGAG	18662069	22	59.42	50	0	0	0	CAACCCCTCCAAAATCCTCCTA
KM_IND_120	chr11	22611322	22611336	5703.98	499	AAGTTCCAAATGCCC	A	DEL	15	196	22611318	22	60.61	50	0	0	0	CTTGAAGTTCCAAATGCCCAGC	22611513	22	59.84	50	11.17	11.17	38.37	CGATGGTCGGAAACTTGTCAAG
KM_IND_121	chr08	10624182	10624183	2866.06	646	CA	C	DEL	15	150	10624178	22	59.96	45.45	4.21	0	40.23	TTGACAGCATTTGAGGCTCTCT	10624327	22	60.22	50	3.57	0	44.29	CTTCGTGGTGATCGAATCGAGA
KM_IND_122	chr12	16168390	16168393	390.36	569	GGAA	G	DEL	16	175	16168386	22	58.95	45.45	0	0	0	AGGAGGAAGAAGAAGGTGTTGT	16168560	22	60.55	45.45	0	0	0	TCCATGTTGAACCTTGCGATGA
KM_IND_123	chr08	15976421	15976424	1334	395	CGCA	C	DEL	15	441	15976417	24	59.96	41.67	5.61	0	43.63	ACATCGCAGAGTATATGCTCAAGT	15976857	22	60.16	50	7.76	6.69	45.83	GCGATATTGCTGGAGCGTATTG
KM_IND_124	chr05	20521083	20521084	1319.76	557	TC	T	DEL	16	115	20521079	24	59.24	41.67	0	0	0	TGCATCGTATATAGCTCAGACACT	20521193	22	59.9	50	0	0	0	GCAAGTCTGATGTAATGTGGGC
KM_IND_125	chr08	26893535	26893538	1572.07	382	TCTC	T	DEL	15	383	26893532	20	62.51	60	0	0	0	TCCTCTCCTCCACGCCATGA	26893914	23	60.05	47.83	0	0	36.43	GGTAATGCCTCCAAACTAGGTGA
KM_IND_126	chr10	4055683	4055686	304.77	509	ACGT	A	DEL	16	186	4055680	20	59.97	55	38.69	8.74	44.22	TCGACGTCGACATGGCTATG	4055865	22	59.64	45.45	6.09	0	0	AAGTTGACTCGAGCCTTACACA
KM_IND_127	chr08	16321126	16321129	2895.26	376	ATTC	A	DEL	12	354	16321123	22	59.64	54.55	0	0	0	CGGATTCTTCTTCCCTCTCCTC	16321477	22	59.84	45.45	0	0	45.6	AAATGCTACAAGCTGTCGTTCG
KM_IND_128	chr11	8460183	8460185	1201.96	539	AGT	A	DEL	16	341	8460180	22	60.09	54.55	0	0	0	GAGAGTGAGGTTGAGAAGAGCC	8460520	22	59.57	50	0.25	0	39.06	TCACAGTCGACTACCATTAGGC
KM_IND_129	chr08	13968728	13968731	2113.98	607	CAAG	C	DEL	15	362	13968725	25	59.2	40	0	0	0	GTACAAGAAACCACAAACAAAGGAC	13969086	22	59.44	45.45	0	0	39.48	TGAGGTAGATTCGCAAGTCACA
KM_IND_130	chr04	31577836	31577837	653.02	364	TG	T	DEL	14	452	31577834	19	60.76	57.89	0	0	0	GTTGGGGTTGGGTTGCACT	31578285	22	59.77	50	0	0	0	CGGGGAGTGAAATTTGTGAGTG
KM_IND_131	chr02	18642107	18642116	2643.61	245	TAGCGTAGGC	T	DEL	14	429	18642105	20	60.66	60	9.6	9.6	43.41	GGTAGCGTAGGCAGCGTATG	18642533	22	60.22	45.45	10.83	0	0	AAAAACCATCGGCGCATATCAC
KM_IND_132	chr06	16877829	16877830	1258.77	317	AG	A	DEL	14	481	16877827	20	59.96	60	0	0	40.87	CCAGGGAGTTGGAGTTGGAC	16878307	22	59.89	50	0	0	43.16	TCCATGAATTGGCAGGGATAGG
KM_IND_133	chr08	15976390	15976393	987.77	403	CGCA	C	DEL	15	409	15976388	22	63.99	54.55	0	0	45.05	CTCGCAGCTGGTACGCCATTTT	15976796	22	60.16	50	0	0	0	CAGAACGTCTCGCTATCAAGGT
KM_IND_134	chr02	18480229	18480232	4698.3	463	GTGC	G	DEL	15	288	18480227	22	60.16	50	5.57	5.4	41.98	TGGTGCGACTACGTGGTTATAC	18480514	21	60.13	57.14	0	0	0	GGTTCCAAGATCACCGAGGAG
KM_IND_135	chr02	18480229	18480232	4698.3	463	GTGC	G	DEL	15	294	18480227	22	60.16	50	5.57	5.4	41.98	TGGTGCGACTACGTGGTTATAC	18480513	22	60.42	54.55	0	0	0	GTTCCAAGATCACCGAGGAGAC
KM_IND_136	chr08	10723406	10723407	2125.99	537	GC	G	DEL	15	217	10723404	22	59.7	50	0	0	0	CTGCCACTCCCTTTCTGAAGTA	10723620	22	60.16	50	0	0	0	GAACAGATGCTCCAAGATCCGA
KM_IND_137	chr07	21694894	21694897	841.77	445	AGAG	A	DEL	16	214	21694892	22	58.78	50	0	0	0	CGAGAGGAGGAGGCTTTACATA	21695105	22	60.03	45.45	0	0	0	AACGGTTTCACACATACAAGCG
KM_IND_138	chr06	4577571	4577572	1013.63	534	CT	C	DEL	16	229	4577569	23	59.68	43.48	10.09	0	0	TACTTAAGAAGCAGCACCACAGA	4577797	22	60.16	45.45	0	0	0	TTTGCAGGGCTTTGTGGTTAAC
KM_IND_139	chr04	31577836	31577837	653.02	364	TG	T	DEL	14	452	31577835	19	60.76	57.89	0	0	0	TTGGGGTTGGGTTGCACTG	31578286	22	60.16	45.45	0	0	0	ACGGGGAGTGAAATTTGTGAGT
KM_IND_140	chr06	16877829	16877830	1258.77	317	AG	A	DEL	14	372	16877828	20	59.96	60	0	0	0	CAGGGAGTTGGAGTTGGACC	16878199	22	59.96	54.55	3.69	0	0	CCTCCTCTATAGCTGGCCTAGT
KM_IND_141	chr02	18642107	18642116	2643.61	245	TAGCGTAGGC	T	DEL	14	428	18642106	21	60.93	57.14	8.93	2.39	43.41	GTAGCGTAGGCAGCGTATGAC	18642533	22	60.22	45.45	10.83	0	0	AAAAACCATCGGCGCATATCAC
KM_IND_142	chr08	15976390	15976393	987.77	403	CGCA	C	DEL	15	408	15976389	22	63.64	50	11.64	0	45.05	TCGCAGCTGGTACGCCATTTTT	15976796	22	60.16	50	0	0	0	CAGAACGTCTCGCTATCAAGGT
KM_IND_143	chr11	23310209	23310211	348.28	418	GAC	G	DEL	13	143	23310208	22	59.57	50	0	0	0	GGACACAGACCGTTAGCAGATA	23310350	22	59.7	45.45	0	0	0	TGCGTAATTGTGACTACCAGGT
KM_IND_144	chr08	10723406	10723407	2125.99	537	GC	G	DEL	15	197	10723405	22	59.7	50	0	0	0	TGCCACTCCCTTTCTGAAGTAG	10723601	22	59.9	45.45	0	0	34.6	CGATGGGCACAATTAGGCAATT
KM_IND_145	chr08	10723406	10723407	2125.99	537	GC	G	DEL	15	103	10723405	22	59.7	50	0	0	0	TGCCACTCCCTTTCTGAAGTAG	10723508	22	60.03	45.45	2.19	0	0	TTTGCAGCCTAGAGAGCATGAA
KM_IND_146	chr09	3344052	3344054	1496.76	613	AGG	A	DEL	16	364	3344051	22	60.03	54.55	0	0	0	CAGGGGTCAGGGTACTTCTTTC	3344414	22	60.29	45.45	0	0	0	ACCAATGCCTAATGTGTCAGCT
KM_IND_147	chr06	4577571	4577572	1013.63	534	CT	C	DEL	16	228	4577570	22	59.9	45.45	10.09	0	0	ACTTAAGAAGCAGCACCACAGA	4577797	22	60.16	45.45	0	0	0	TTTGCAGGGCTTTGTGGTTAAC
KM_IND_148	chr09	3344052	3344054	1496.76	613	AGG	A	DEL	16	400	3344051	22	60.03	54.55	0	0	0	CAGGGGTCAGGGTACTTCTTTC	3344432	22	60.09	50	6.96	0	0	CACCCAAGATAGCAGCTAACCA
KM_IND_149	chr07	21694894	21694897	841.77	445	AGAG	A	DEL	16	453	21694893	23	59.99	52.17	0	0	40.48	GAGAGGAGGAGGCTTTACATAGC	21695345	22	59.89	50	4.28	3.96	41.33	TCTCCATATGGACACATGGCAG
KM_IND_150	chr08	13968728	13968731	2113.98	607	CAAG	C	DEL	15	427	13968727	25	60.57	40	0	0	0	ACAAGAAACCACAAACAAAGGACTG	13969151	22	59.89	45.45	0	0	0	AGCTGTGTGAAGAGTTCCATGT
KM_IND_151	chr07	11318069	11318075	1787.76	556	TTCTAGA	T	DEL	16	329	11318068	25	56.8	40	0	0	0	GTTCTAGATTGTCCCATATGTTAGG	11318396	22	59.52	50	18.44	18.44	33.43	GGAGGAATCGACACAACTGTTG
KM_IND_152	chr08	15976390	15976393	987.77	403	CGCA	C	DEL	15	214	15976390	21	62.4	52.38	4.89	0	45.05	CGCAGCTGGTACGCCATTTTT	15976603	22	60.16	50	0	0	0	GTGTAATCTGGATCGCTGTGGA
KM_IND_153	chr02	18480229	18480232	4698.3	463	GTGC	G	DEL	15	286	18480229	22	59.9	50	4.28	0	41.98	GTGCGACTACGTGGTTATACCT	18480514	21	60.13	57.14	0	0	0	GGTTCCAAGATCACCGAGGAG
KM_IND_154	chr11	23409097	23409105	1991.63	335	CTGAAACCG	C	DEL	12	341	23409097	22	59.97	45.45	0	0	46.48	CTGAAACCGTGAAACGAAAGCT	23409436	22	60.03	54.55	8.33	0	35.52	GTCCTCTTGAGGGAGACAACTG
KM_IND_155	chr07	21694894	21694897	841.77	445	AGAG	A	DEL	16	213	21694894	22	59.03	50	0	0	40.48	AGAGGAGGAGGCTTTACATAGC	21695105	22	60.03	45.45	0	0	0	AACGGTTTCACACATACAAGCG
KM_IND_156	chr07	11294062	11294063	279.36	504	GC	G	DEL	16	474	11294062	22	62.14	54.55	29.98	0	36.12	GCCATGGCTCCACTACCATGTA	11294535	22	60.16	45.45	0	0	42.24	TGTTACATCCCGTGTGTTGGAA
KM_IND_157	chr08	13968728	13968731	2113.98	607	CAAG	C	DEL	15	499	13968728	24	59.14	41.67	0	0	0	CAAGAAACCACAAACAAAGGACTG	13969226	22	59.55	45.45	0	0	38	TGTTGGAAGAACCCTCCATTGA
KM_IND_158	chr03	21951262	21951262	1433.29	447	G	GATC	INS	15	428	21951240	24	59.43	41.67	0	0	0	CTCTTCATGTGATGCTTCGATTGA	21951667	22	59.84	50	5.55	0	0	GAGTTCTTGCAGACGTTTAGCC
KM_IND_159	chr07	13640965	13640965	384.76	606	G	GT	INS	16	478	13640943	25	59.77	40	24.39	0	41.34	CCATTACAAATTGCGCATGTAAGAC	13641420	22	59.77	50	5.25	0	0	TAGCTGGCTGAACTTACTGTCC
KM_IND_160	chr11	6193152	6193152	671.32	230	C	CGT	INS	15	396	6193132	22	61.87	50	0	0	0	TATGTGTGTGTGTGTGTGTGCG	6193527	22	60.16	50	0	0	0	AATCCCCTTCAAGATAGTGCGG
KM_IND_161	chr11	17946915	17946915	3576.29	480	A	AGCCTCGCGACCCGCC	INS	15	137	17946895	22	60.61	50	0.37	0.37	41.94	GAACTGCTTCATGGCAACCAAG	17947031	22	60.16	45.45	0	0	0	TTACTGAAGAGGGTTGGCGTTT
KM_IND_162	chr01	7136955	7136955	7134.89	428	A	ACCTATAAAG	INS	14	201	7136935	22	60.69	50	0	0	32.64	TCATCATCTTCCATGGGGCAAC	7137135	22	60.22	50	14.81	4.41	0	CAACAGCGTATGATCAAGCCAC
KM_IND_163	chr06	21379165	21379165	618.96	438	T	TGTAC	INS	14	282	21379145	22	61.06	54.55	0	0	39.32	CTTACCATCTGGCTCTTCGCTG	21379426	22	59.69	50	0	0	0	CCCAAAGTCAATCCCTACACCT
KM_IND_164	chr12	16598910	16598910	672.77	546	C	CAT	INS	16	430	16598890	22	58.86	40.91	0	0	0	AAGACTTGCGTGCTGAATTACA	16599319	22	59.39	45.45	15.77	2.8	38.48	CAACAACTCACGTAGCTTGTGT
KM_IND_165	chr01	29997100	29997100	887.82	535	A	AG	INS	16	218	29997081	21	59.54	52.38	21.04	0	36.2	CAGTGCACACGATGGTTACAG	29997299	22	59.96	45.45	0	0	44.93	TCTGCATTGGAAGAAGCCTCTT
KM_IND_166	chr12	19695865	19695865	2159.64	423	T	TCCACCAGCA	INS	14	114	19695846	22	60.55	50	8.05	0	31.34	TTCTCTCACCTCCACAATGTGC	19695960	22	59.27	45.45	10	6.29	0	CCGACAAGTAATTCGAAACGGT
KM_IND_167	chr02	32975788	32975788	323.75	259	T	TG	INS	16	169	32975769	22	60.88	54.55	0	0	0	GAAGAGAAGGGAGCAAAGGTGG	32975937	22	60.48	54.55	0	0	0	CTTCTCTCGATTGCTCTTCCCC
KM_IND_168	chr02	32975788	32975788	323.75	259	T	TG	INS	16	182	32975769	22	60.88	54.55	0	0	0	GAAGAGAAGGGAGCAAAGGTGG	32975951	22	60.09	54.55	0	0	0	CATTGTACCCCACCCTTCTCTC
KM_IND_169	chr06	21379165	21379165	618.96	438	T	TGTAC	INS	14	138	21379146	22	61.74	50	0	0	39.32	TTACCATCTGGCTCTTCGCTGT	21379283	22	59.57	50	0	0	0	TTAGATGACGAGGTAGTGTGGC
KM_IND_170	chr11	21841487	21841487	1137.05	584	T	TTCA	INS	16	456	21841468	22	60.22	54.55	0	0	42.34	GCTCCAGGATCATCCAGTCTTC	21841923	22	59.83	50	0	0	0	GAGGTTGGAAGGATCGACATGA
KM_IND_171	chr04	32134658	32134658	4727.74	345	G	GCGCCGAGT	INS	11	194	32134640	20	60.25	55	7.55	7.55	44.98	GTGTTCACTTTGGGTGCAGC	32134833	22	59.9	50	0	0	0	GGGTTTTTAGCTGCGTCTCATC
KM_IND_172	chr01	33230246	33230246	639.05	339	A	ACGGCGG	INS	14	451	33230228	20	60.68	60	0	0	0	AGGACGAGGAGGAACGAGAC	33230678	22	60.16	50	0	0	38.66	AACTCCACAACCCCTTGTACTG
KM_IND_173	chr01	29997100	29997100	887.82	535	A	AG	INS	16	219	29997082	21	60.61	52.38	21.04	0	36.2	AGTGCACACGATGGTTACAGG	29997299	22	59.96	45.45	0	0	44.93	TCTGCATTGGAAGAAGCCTCTT
KM_IND_174	chr08	17766848	17766848	424.24	386	T	TCTGCGC	INS	15	266	17766830	21	59.94	52.38	3.62	0	43.02	CCGATGTCGACGAATGAGTCT	17767095	22	59.77	45.45	8.73	8.73	0	ACGGCTAAAAATTGGGAAGCTG
KM_IND_175	chr08	17766848	17766848	424.24	386	T	TCTGCGC	INS	15	265	17766830	22	61.1	54.55	3.62	0	43.02	CCGATGTCGACGAATGAGTCTG	17767094	22	60.42	50	4.16	0	0	CGGCTAAAAATTGGGAAGCTGG
KM_IND_176	chr02	32975788	32975788	323.75	259	T	TG	INS	16	168	32975770	22	62.22	54.55	0	0	0	AAGAGAAGGGAGCAAAGGTGGG	32975937	22	60.48	54.55	0	0	0	CTTCTCTCGATTGCTCTTCCCC
KM_IND_177	chr05	20521070	20521070	1552.62	560	G	GTATA	INS	16	142	20521052	22	59.96	50	6.15	0	40.92	GCTAGGCATGCTCTGTCTGTAT	20521193	22	59.9	50	0	0	0	GCAAGTCTGATGTAATGTGGGC
KM_IND_178	chr05	20441053	20441053	724.72	545	G	GA	INS	16	121	20441035	22	59.84	45.45	0	0	0	CGCATCCATCAACGAAAGGAAA	20441155	22	59.84	50	0	0	0	GATCTTGCCGTTGTGTGAAGAG
KM_IND_179	chr06	16858305	16858305	2588.66	527	T	TGAG	INS	14	121	16858287	23	60.06	43.48	0	0	0	TGCAGCAATTCTTCCATTTGAGG	16858407	22	60.09	45.45	26.32	4.61	35.19	GTGCCAAACATGTGATGCATCT
KM_IND_180	chr05	20521070	20521070	1552.62	560	G	GTATA	INS	16	142	20521052	24	60.08	45.83	6.15	0	40.92	GCTAGGCATGCTCTGTCTGTATAT	20521193	22	59.9	50	0	0	0	GCAAGTCTGATGTAATGTGGGC
KM_IND_181	chr05	20441053	20441053	724.72	545	G	GA	INS	16	121	20441035	24	60.85	41.67	0	0	0	CGCATCCATCAACGAAAGGAAAAA	20441155	22	59.84	50	0	0	0	GATCTTGCCGTTGTGTGAAGAG
KM_IND_182	chr12	19695865	19695865	2159.64	423	T	TCCACCAGCA	INS	14	100	19695848	21	61.27	57.14	0.92	0	31.34	CTCTCACCTCCACAATGTGCG	19695948	22	59.11	45.45	0	0	0	TCGAAACGGTGGAGTAGAGAAA
KM_IND_183	chr03	21951262	21951262	1433.29	447	G	GATC	INS	15	423	21951245	22	57.19	40.91	4.11	2.58	0	CATGTGATGCTTCGATTGATCA	21951667	22	59.84	50	5.55	0	0	GAGTTCTTGCAGACGTTTAGCC
KM_IND_184	chr08	6156086	6156086	3651.12	387	A	ATGG	INS	11	334	6156069	22	59.9	50	0	0	40.37	GCAAGATGATGATAGCGATGGC	6156402	22	59.77	50	0	0	0	TAGCTCATCCTAATCCGCCATG
KM_IND_185	chr11	17388964	17388964	5280.29	538	A	AATT	INS	15	287	17388947	22	59.96	45.45	0	0	40.86	AGCGTTGGAAGGTACTGAATGT	17389234	22	60.09	54.55	0	0	0	GAGAATAGGTGGGTTGGGACTG
KM_IND_186	chr11	16356073	16356073	1418.16	539	C	CAT	INS	14	241	16356056	22	57.04	40.91	10.51	10.51	0	TCAGAGAGAAATTGAAGCATGC	16356296	22	60.16	45.45	0	0	0	TTTCTCTGCAAGCTCCTCAACA
KM_IND_187	chr08	7699122	7699122	2811.53	560	C	CGAAT	INS	12	335	7699105	22	60.29	54.55	0	0	44.7	CTCCATCAGGATAGAAGCTGCC	7699439	22	60.16	50	4.67	0.04	0	AACAACCTCTGAGTGTTCCTGG
KM_IND_188	chr11	18411434	18411434	1318.76	586	C	CT	INS	16	178	18411417	22	60.03	45.45	16.02	0	34.98	TGTGATGTATGCAGCCACTTCT	18411594	22	59.76	45.45	0	0	0	ATCTGGAGGCTTCAAATGCTCT
KM_IND_189	chr06	16858305	16858305	2588.66	527	T	TGAG	INS	14	120	16858288	23	59.81	43.48	0	0	35.41	GCAGCAATTCTTCCATTTGAGGA	16858407	22	60.09	45.45	26.32	4.61	35.19	GTGCCAAACATGTGATGCATCT
KM_IND_190	chr03	21951262	21951262	1433.29	447	G	GATC	INS	15	429	21951245	25	60.05	40	20.1	18.51	39.77	CATGTGATGCTTCGATTGATCATCA	21951675	22	60.03	50	2.77	0	0	TCCTTCTCGAGTTCTTGCAGAC
KM_IND_191	chr04	32134658	32134658	4727.74	345	G	GCGCCGAGT	INS	11	192	32134642	19	60.01	57.89	10.24	0	44.98	GTTCACTTTGGGTGCAGCG	32134833	22	59.9	50	0	0	0	GGGTTTTTAGCTGCGTCTCATC
KM_IND_192	chr02	16002888	16002888	5201.18	454	A	ACCT	INS	14	166	16002872	20	62.46	60	4.12	0.48	0	GAGACGCTGGCCAAGAACCT	16003038	22	59.9	45.45	0	0	0	TGAGACTTGAGAGACGTTGCAA
KM_IND_193	chr01	29997100	29997100	887.82	535	A	AG	INS	16	215	29997084	20	60.32	55	0	0	0	TGCACACGATGGTTACAGGG	29997300	22	59.96	45.45	0	0	0	TTCTGCATTGGAAGAAGCCTCT
KM_IND_194	chr08	6156086	6156086	3651.12	387	A	ATGG	INS	11	333	6156070	22	59.65	50	0	0	46.35	CAAGATGATGATAGCGATGGCG	6156402	22	59.77	50	0	0	0	TAGCTCATCCTAATCCGCCATG
KM_IND_195	chr11	17388964	17388964	5280.29	538	A	AATT	INS	15	186	17388948	22	59.84	50	0	0	40.86	GCGTTGGAAGGTACTGAATGTG	17389133	22	60.22	45.45	0	0	0	ATTGCTGTCCAGATCACAACCA
KM_IND_196	chr11	16356073	16356073	1418.16	539	C	CAT	INS	14	241	16356057	22	57.03	40.91	19.52	18	0	CAGAGAGAAATTGAAGCATGCT	16356297	22	59.77	50	0	0	0	GTTTCTCTGCAAGCTCCTCAAC
KM_IND_197	chr05	3728986	3728986	4070.31	540	T	TG	INS	15	182	3728970	22	60.35	50	0	0	46.48	AGTACGTTGGACGAGTTGGATG	3729151	22	60.03	50	0	0	45.65	GGCCATCACAGAGTGACAAAAC
KM_IND_198	chr08	17766848	17766848	424.24	386	T	TCTGCGC	INS	15	148	17766832	22	61.65	54.55	1.1	0	38.9	GATGTCGACGAATGAGTCTGCG	17766979	22	59.76	50	0	0	35.63	ATTTCCTTGGTAACCCGGAGAG
KM_IND_199	chr06	17045588	17045588	2512.57	494	C	CG	INS	14	170	17045572	22	59.84	50	4.78	0	0	CCAACGTCGAGACACTCTACAT	17045741	22	60.09	50	0	0	40.74	GCTGCAAGAACTTGGGATTGAG
KM_IND_200	chr11	21841487	21841487	1137.05	584	T	TTCA	INS	16	453	21841471	22	58.96	50	0	0	42.34	CCAGGATCATCCAGTCTTCAGA	21841923	22	59.83	50	0	0	0	GAGGTTGGAAGGATCGACATGA
KM_IND_201	chr11	18411434	18411434	1318.76	586	C	CT	INS	16	397	18411418	22	59.39	50	10.42	6.03	32.79	GTGATGTATGCAGCCACTTCTC	18411815	22	59.97	50	0	0	0	CGTGAGCCCATGTGATGATTTC
KM_IND_202	chr11	21841487	21841487	1137.05	584	T	TTCA	INS	16	221	21841471	22	58.96	50	0	0	42.34	CCAGGATCATCCAGTCTTCAGA	21841689	22	59.96	50	0	0	0	TTCCTCTTCACTGTCCACTTCG
KM_IND_203	chr04	32134658	32134658	4727.74	345	G	GCGCCGAGT	INS	11	191	32134643	19	61.84	57.89	3.2	0	44.98	TTCACTTTGGGTGCAGCGC	32134833	22	59.9	50	0	0	0	GGGTTTTTAGCTGCGTCTCATC
KM_IND_204	chr11	17946915	17946915	3576.29	480	A	AGCCTCGCGACCCGCC	INS	15	132	17946900	21	60.34	47.62	18.36	0	40.59	GCTTCATGGCAACCAAGCATT	17947031	22	60.16	45.45	0	0	0	TTACTGAAGAGGGTTGGCGTTT
KM_IND_205	chr11	24175485	24175485	372.19	249	G	GAA	INS	14	230	24175470	21	60.41	47.62	0	0	0	AACTCCCCCGAAACCGAAAAA	24175698	22	60.23	50	0	0	41.41	AGGTAACACAGGGGGTTTGATG
KM_IND_206	chr07	9565408	9565408	343.32	468	G	GT	INS	16	423	9565393	21	60.61	52.38	0	0	36.68	CAGCGATCTGGGAGGGTTTTT	9565814	22	60.09	50	1.62	0	38.89	CGTCGTAATGAGAGGTGAACCA
KM_IND_207	chr05	17382053	17382053	454.78	535	A	AG	INS	16	306	17382038	21	60.06	57.14	0	0	0	GAGAGGTGAATGGAAAGGGGG	17382341	22	59.9	50	0	0	36.25	CACACTTCTTCACCTCTGGGAA
KM_IND_208	chr05	17382053	17382053	454.78	535	A	AG	INS	16	437	17382038	21	60.06	57.14	0	0	0	GAGAGGTGAATGGAAAGGGGG	17382474	22	60.29	50	0	0	0	AGCACGTCCTCTTCTTCCTTTC
KM_IND_209	chr07	9565408	9565408	343.32	468	G	GT	INS	16	424	9565393	21	60.61	52.38	0	0	36.68	CAGCGATCTGGGAGGGTTTTT	9565816	22	60.73	54.55	0	0	0	CCCGTCGTAATGAGAGGTGAAC
KM_IND_210	chr05	17382053	17382053	454.78	535	A	AG	INS	16	327	17382038	21	60.06	57.14	0	0	0	GAGAGGTGAATGGAAAGGGGG	17382364	22	59.84	45.45	0	0	0	TTTAAGTCGGCATAACACGCAC
KM_IND_211	chr06	22867098	22867098	321.08	515	C	CT	INS	16	197	22867083	22	59.17	45.45	16.64	0	0	TGCTGCAGTTGGTATCTAGACA	22867279	22	59.76	50	0	0	0	TCCTCTCTGCTTTCCCATCTTG
KM_IND_212	chr06	21379165	21379165	618.96	438	T	TGTAC	INS	14	133	21379151	20	60.11	55	0	0	39.13	ATCTGGCTCTTCGCTGTGTC	21379283	22	59.57	50	0	0	0	TTAGATGACGAGGTAGTGTGGC
KM_IND_213	chr06	21379165	21379165	618.96	438	T	TGTAC	INS	14	276	21379151	20	60.11	55	0	0	39.13	ATCTGGCTCTTCGCTGTGTC	21379426	22	59.69	50	0	0	0	CCCAAAGTCAATCCCTACACCT
KM_IND_214	chr01	29997100	29997100	887.82	535	A	AG	INS	16	413	29997086	20	60.39	60	0	0	0	CACACGATGGTTACAGGGGG	29997498	22	59.77	50	0	0	44.17	CGGACAGAGGATGTGAAGAGTT
KM_IND_215	chr08	11065374	11065374	1247.99	406	C	CGAA	INS	15	286	11065360	22	60.47	54.55	0	0	34.7	CGAGACGAAGGAGACGAAGAAG	11065646	22	59.96	50	0	0	0	GGGTCCATTCCTCTCCTTTGTT
KM_IND_216	chr08	27320830	27320830	2949.6	288	G	GGAGCATGCCGTT	INS	14	150	27320816	22	64.45	59.09	0	0	38.2	GAACATGTCGCCGTGGTCCAAC	27320966	20	64.55	60	0	0	0	AAGTACTGCCGCCACTGCCA
KM_IND_217	chr08	7699122	7699122	2811.53	560	C	CGAAT	INS	12	340	7699108	22	60.55	54.55	0	0	0	CATCAGGATAGAAGCTGCCCAG	7699447	22	60.22	50	3.66	0	0	CGACCTTGAACAACCTCTGAGT
KM_IND_218	chr06	29343213	29343213	2644.92	418	C	CGAG	INS	13	227	29343200	20	59.83	60	0	0	0	CTGAGGACAACGACGAGGAG	29343426	22	59.29	45.45	21.36	2.83	0	TCATAGGTAGGATTGGCATGCA
KM_IND_219	chr06	29343213	29343213	2644.92	418	C	CGAG	INS	13	483	29343200	20	59.83	60	0	0	0	CTGAGGACAACGACGAGGAG	29343677	22	59.82	45.45	16.68	0	0	AATTCATCTCTGCATGCCTCCT
KM_IND_220	chr02	18570307	18570307	4390.17	493	C	CCAG	INS	14	222	18570294	21	59.47	52.38	0	0	0	CACATGATAATGGCCTCGCTG	18570515	22	59.96	50	0	0	44.82	AGAATATCAGCTCTGGCGGAAG
KM_IND_221	chr03	10893725	10893725	859.63	562	T	TC	INS	16	319	10893712	22	60.09	50	0	0	40.92	CTTGCTAAAGGCCTCCCATACA	10894034	22	59.38	50	6.49	7.63	41.03	CTGGCTAACAGTATTGCCATGG
KM_IND_222	chr12	24070971	24070971	1316.22	417	T	TCAG	INS	15	173	24070959	18	59.97	55.56	2.66	0	45.49	ACAGCAGCAGCATCAGCA	24071131	22	60.22	45.45	20.81	20.2	0	CGGCTGATTTATTGCATGCAGT
KM_IND_223	chr03	20182499	20182499	2068.63	641	A	ACTC	INS	16	195	20182487	22	59.83	50	0	0	41.75	AACGGTCTAGGCACTCAAGATC	20182681	22	60.22	45.45	0	0	0	AGCCTGCAAAAACTCTCTCCAT
KM_IND_224	chr11	17128182	17128182	951.38	500	T	TTC	INS	16	136	17128170	22	60.89	45.45	0	0	38.11	AACAAACTCCAGTTGGGCAGTT	17128305	22	60.09	50	0	0	44.61	GAAGGCATGAGCAGTTTGGAAG
KM_IND_225	chr12	126054	126054	2311.6	304	G	GAGTAGCAATTGC	INS	14	338	126043	20	60.81	60	16.21	16.21	0	CACCGGAGAATGAGCAGCTC	126381	22	59.96	54.55	0	0	0	GCGGGAGAAGGAAGAATAGGAG
KM_IND_226	chr02	12971608	12971608	3966.4	361	C	CATCT	INS	13	269	12971597	22	59.9	54.55	0	0	0	CTCCTCCCGAACATCTACAAGG	12971868	22	59.96	45.45	5.05	0	35.63	ACAATTGCTTTACCTTTGGGCC
KM_IND_227	chr02	12971608	12971608	3966.4	361	C	CATCT	INS	13	292	12971597	22	59.9	54.55	0	0	0	CTCCTCCCGAACATCTACAAGG	12971890	22	59.97	50	0	0	0	AAGCGTCCGTCTCTTATAGCTG
KM_IND_228	chr08	26970463	26970463	3102.21	510	C	CCAG	INS	14	359	26970452	22	60.03	50	5.35	3.36	0	GTTTTGAGCAACCGGTAGTGTC	26970812	22	60.03	50	13.15	13.15	34.29	TGGACTTCCCCTTGCAATAGTC
KM_IND_229	chr12	16463124	16463124	1199.73	552	C	CTGA	INS	16	358	16463113	22	60.03	45.45	0	0	0	TTATTGTGCTCCTCATGGCTGT	16463470	22	60.29	45.45	0	0	0	TGAAATGGCGGTGAACATTGTG
KM_IND_230	chr02	18569992	18569992	3908.9	526	C	CTT	INS	14	403	18569981	24	59.78	41.67	0	0	0	TGCTATTCTTTCTCTCTGCAAGGA	18570383	22	59.96	45.45	0	0	0	TTACTGCACCATCCACATCACA
KM_IND_231	chr02	16002888	16002888	5201.18	454	A	ACCT	INS	14	105	16002879	20	64.83	60	6.7	0	0	TGGCCAAGAACCTGCCTGCA	16002983	22	60.42	54.55	0	0	37.07	GTCCATCCTCCGTGGTAAGAAC
KM_IND_232	chr08	17558623	17558623	2947.57	403	C	CCT	INS	14	184	17558614	22	59.83	50	4.73	4.73	42.82	TCATCGAGACTAAGGAGGTCGA	17558797	22	60.16	50	7.83	0	0	GGGATTTGATGAAGGAGCTCGA
KM_IND_233	chr06	22353340	22353340	1063.76	602	G	GGTA	INS	16	170	22353331	25	59.28	40	15.12	13.5	46.73	AGCTTAATTGGTAGTACTGGTACCA	22353500	22	59.24	45.45	0	0	46.91	TGACCGCTCTTAAGCTTATCCA
KM_IND_234	chr12	19695865	19695865	2159.64	423	T	TCCACCAGCA	INS	14	106	19695857	20	61.01	55	12.47	10.29	31.34	CCACAATGTGCGGCAACATG	19695960	22	59.27	45.45	10	6.29	0	CCGACAAGTAATTCGAAACGGT
KM_IND_235	chr11	28814369	28814369	285.58	320	T	TATC	INS	13	293	28814361	22	59.64	50	0	0	0	CTCCTCCATATCACTTGACGCT	28814653	24	60.02	41.67	5.53	5.53	0	TCTCCCATACAACAACGTACATGT
KM_IND_236	chr11	28814369	28814369	285.58	320	T	TATC	INS	13	308	28814361	22	59.64	50	0	0	0	CTCCTCCATATCACTTGACGCT	28814665	23	60.18	47.83	0	0	0	CCGTCGTGTTATTCTCCCATACA
KM_IND_237	chr07	10766457	10766457	830.29	622	T	TA	INS	16	298	10766449	22	59.9	50	0	0	0	GGATACCATAGAACCGTGTGCT	10766746	22	60.22	50	0	0	0	CAATATCCAAGCCGCACAGTTC
KM_IND_238	chr12	13675054	13675054	1269.76	630	T	TA	INS	16	485	13675046	22	56.26	40.91	0	0	37.03	GCATGTAATAAGCCCAAAAAGG	13675530	22	59.76	50	0	0	0	GCCCACTATTCAACACTCTCCT
KM_IND_239	chr12	16598910	16598910	672.77	546	C	CAT	INS	16	423	16598902	24	59.67	41.67	5.77	0	41.3	CTGAATTACAGTCTTGATTCGCGT	16599324	22	60.48	45.45	1.84	0	0	TGCTTCAACAACTCACGTAGCT
KM_IND_240	chr11	6193152	6193152	671.32	230	C	CGT	INS	15	345	6193145	19	60.23	57.89	0	0	0	GTGTGTGCGTGTGTGTGTG	6193489	22	59.97	50	0	0	31.56	GTCTGAGTTTGTCGGGTGTTTG
KM_IND_241	chr11	6193152	6193152	671.32	230	C	CGT	INS	15	345	6193145	19	60.23	57.89	0	0	0	GTGTGTGCGTGTGTGTGTG	6193487	22	59.97	50	0	0	0	CTGAGTTTGTCGGGTGTTTGTC
KM_IND_242	chr12	23884651	23884651	6228.26	570	C	CGAT	INS	15	229	23884644	22	59.59	45.45	2.98	0	42.66	GCGACGACGACTGACATTTTAA	23884871	22	60.09	45.45	0	0	36.65	TGCATGACTATGTACGCTGGTT
KM_IND_243	chr05	21529130	21529130	2259.86	348	C	CACATGTTCTTCT	INS	14	397	21529123	22	60.29	50	0	0	0	CTTTGGACACACGTTCTTCTGC	21529519	22	60.03	50	0	0	0	GACAGAGCCAACAAGATCCAGA
KM_IND_244	chr02	2494450	2494450	1116.76	539	C	CT	INS	16	103	2494443	22	62.19	50	5.52	0	46.19	ATGGAGGCTTTCCCCCTGTTTT	2494546	22	60.94	50	0	0	46.33	GCGAAAACCTGGCTGAGGAATA
KM_IND_245	chr06	21379219	21379219	2598.14	431	T	TGCCGCACC	INS	14	219	21379213	20	59.83	55	0	0	32.76	GCTCGTTGCCTCAATGTCAC	21379431	22	59.49	50	0	0	0	GTAGCCCCAAAGTCAATCCCTA
KM_IND_246	chr06	13500956	13500956	2134.05	458	A	AAGG	INS	14	426	13500950	21	60.34	57.14	18.17	0	0	CACACCAAGGAGCTACTGGAC	13501375	22	60.16	50	0	0	32.5	CTGTTTCTGCTCCAACATACGC
KM_IND_247	chr07	29258497	29258497	4640.85	523	T	TCCG	INS	11	381	29258491	22	60.36	50	0	0	0	CCCGCTTCAACCTTATCCTCAA	29258871	22	60.09	50	0	0	0	GGAAGCTGTGATGACCTAACGA
KM_IND_248	chr02	24285163	24285163	2866.31	405	T	TCTGCAAGA	INS	13	147	24285157	22	60.75	50	0	0	34.04	GGCTAATCTGCAACGGGTACAT	24285303	22	59.7	45.45	0	0	29.81	ATTTGGAGCCCGAAAAGTGTTC
KM_IND_249	chr08	17558620	17558620	2020.64	403	A	AT	INS	14	184	17558614	22	59.83	50	4.73	4.73	42.82	TCATCGAGACTAAGGAGGTCGA	17558797	22	60.16	50	7.83	0	0	GGGATTTGATGAAGGAGCTCGA
KM_IND_250	chr08	18365	18365	2802.6	582	C	CTT	INS	14	360	18359	23	59.36	43.48	0	0	45.55	TTTTCTCTGAGAACCTCTCTGCA	18718	22	59.83	45.45	0	0	0	ACAGCACCACTAAAGAACCTGT
KM_IND_251	chr07	10970492	10970492	787.13	613	T	TTA	INS	16	387	10970486	23	59.68	47.83	0	0	31.75	ATAACCTTATCTGGGCGAGACTG	10970871	23	60.12	43.48	6.12	0	33.42	ACCTTCCCAATTATTGCATTGCC
KM_IND_252	chr02	2494450	2494450	1116.76	539	C	CT	INS	16	103	2494445	20	60.18	55	0	0	40.37	GGAGGCTTTCCCCCTGTTTT	2494545	22	58.66	45.45	0	0	46.33	CGAAAACCTGGCTGAGGAATAA
KM_IND_253	chr02	24285163	24285304	2866.31	405	T	TCTGCAAGA	INS	13	141	24285158	22	59.71	50	0	0	0	GCTAATCTGCAACGGGTACATG	24285300	22	59.96	45.45	0	0	35.83	TGGAGCCCGAAAAGTGTTCATA
KM_IND_254	chr11	15409148	15409148	1837.42	402	C	CTGG	INS	15	277	15409144	19	59.24	57.89	0	0	0	TCATCTGGTGGTGGTGGTG	15409420	22	59.84	45.45	2.29	0	0	GGCGAAACAATGACAATGCCTA
KM_IND_255	chr11	5610100	5610100	1694.53	397	T	TCTG	INS	15	150	5610096	19	62.55	57.89	27.67	19.92	43.24	AAGCTCTGCTGCTGCTGCT	5610244	22	59.25	45.45	17.19	0	0	TCAAATCTCGACGAGCTCTTCT
KM_IND_256	chr07	10766457	10766457	830.29	622	T	TA	INS	16	141	10766453	22	59.96	45.45	0	0	0	ACCATAGAACCGTGTGCTTTCT	10766588	22	59.96	50	1.53	0	45.19	GGTTCCCCAGAAGCTAGGAAAA
KM_IND_257	chr11	6193152	6193152	671.32	230	C	CGT	INS	15	303	6193149	19	60.23	57.89	0	0	0	GTGCGTGTGTGTGTGTGTG	6193439	22	60.02	45.45	5.01	0	35.28	ATCCTTGAATTGTGGAGGCCAT
KM_IND_258	chr12	23884651	23884651	6228.26	570	C	CGAT	INS	15	224	23884648	22	59.91	50	0	0	0	CGACGACTGACATTTTAACCGG	23884872	22	59.9	45.45	0	0	36.65	ATGCATGACTATGTACGCTGGT
KM_IND_259	chr08	18365	18365	2802.6	582	C	CTT	INS	14	358	18362	22	59.96	50	17.75	17.19	45.55	TCTCTGAGAACCTCTCTGCAGA	18718	22	59.83	45.45	0	0	0	ACAGCACCACTAAAGAACCTGT
KM_IND_260	chr08	18365	18365	2802.6	582	C	CTT	INS	14	461	18362	22	59.96	50	17.75	17.19	45.55	TCTCTGAGAACCTCTCTGCAGA	18822	22	58.96	45.45	0	0	0	TGGATTTAGGCCATACTCACGA
KM_IND_261	chr08	18365	18365	2802.6	582	C	CTT	INS	14	355	18362	22	59.96	50	17.75	17.19	45.55	TCTCTGAGAACCTCTCTGCAGA	18718	22	59.83	45.45	0	0	0	ACAGCACCACTAAAGAACCTGT
KM_IND_262	chr07	10970492	10970492	787.13	613	T	TTA	INS	16	382	10970489	22	60.36	50	0	0	31.75	ACCTTATCTGGGCGAGACTGTA	10970870	22	58.53	45.45	6.12	0	33.42	CCTTCCCAATTATTGCATTGCC
KM_IND_263	chr02	17678152	17678152	1669.03	329	C	CTGA	INS	15	104	17678150	20	64.02	60	0	0	0	TACTCGGTGGTGCATGGCGA	17678253	22	60.73	54.55	19.67	14.89	44.61	CGTACGTACCCCTTGAACGTAC
KM_IND_264	chr01	7136955	7136955	7134.89	428	A	ACCTATAAAG	INS	14	183	7136953	21	61.01	57.14	0	0	0	CAACCATCGAAGCCTGAGGAC	7137135	22	60.22	50	14.81	4.41	0	CAACAGCGTATGATCAAGCCAC
KM_IND_265	chr12	126054	126054	2311.6	304	G	GAGTAGCAATTGC	INS	14	329	126052	21	60.41	47.62	29.28	4.59	46.83	ATGAGCAGCTCATCCAATGCA	126381	22	59.96	54.55	0	0	0	GCGGGAGAAGGAAGAATAGGAG
KM_IND_266	chr12	126054	126054	2311.6	304	G	GAGTAGCAATTGC	INS	14	174	126052	21	60.41	47.62	29.28	4.59	46.83	ATGAGCAGCTCATCCAATGCA	126225	22	60.55	50	3.37	0	0	ATCTGCAGTGTGAGTGTGAGTG
KM_IND_267	chr05	21529130	21529130	2259.86	348	C	CACATGTTCTTCT	INS	14	457	21529128	22	60.03	50	0	0	0	GACACACGTTCTTCTGCAACTC	21529584	22	59.91	45.45	0	0	39.58	CTCGACGACGCAAATCAATCAA
KM_IND_268	chr06	21379219	21379219	2598.14	431	T	TGCCGCACC	INS	14	214	21379217	22	60.1	50	0	0	42.89	GTTGCCTCAATGTCACCACATC	21379430	22	59.49	50	0	0	0	TAGCCCCAAAGTCAATCCCTAC
KM_IND_269	chr06	21379219	21379219	2598.14	431	T	TGCCGCACC	INS	14	215	21379217	22	60.1	50	0	0	42.89	GTTGCCTCAATGTCACCACATC	21379431	22	59.49	50	0	0	0	GTAGCCCCAAAGTCAATCCCTA
KM_IND_270	chr11	6193152	6193152	671.32	230	C	CGT	INS	15	301	6193151	19	60.23	57.89	0	0	0	GCGTGTGTGTGTGTGTGTG	6193439	22	60.02	45.45	5.01	0	35.28	ATCCTTGAATTGTGGAGGCCAT
KM_IND_271	chr11	5610100	5610252	1694.53	397	T	TCTG	INS	15	151	5610099	20	63.08	60	23.97	11.76	37.92	CTCTGCTGCTGCTGCTGGAA	5610246	22	60.73	50	12.85	2.19	31.73	CGTCAAATCTCGACGAGCTCTT
KM_IND_272	chr11	5610100	5610100	1694.53	397	T	TCTG	INS	15	147	5610099	20	63.08	60	23.97	11.76	37.92	CTCTGCTGCTGCTGCTGGAA	5610246	22	60.73	50	12.85	2.19	31.73	CGTCAAATCTCGACGAGCTCTT
KM_IND_273	chr06	13500956	13500956	2134.05	458	A	AAGG	INS	14	243	13500955	21	59.87	57.14	0	0	0	CAAGGAGCTACTGGACGGTAC	13501197	22	59.9	50	0	0	37.83	TATATGGCGTAACCCACACCTG
KM_IND_274	chr01	7136955	7136955	7134.89	428	A	ACCTATAAAG	INS	14	475	7136954	22	61.94	50	0	0	0	AACCATCGAAGCCTGAGGACAA	7137428	22	60.16	50	0	0	0	TCTAGATTGGGTGGCGTTCATC
KM_IND_275	chr11	17128182	17128182	951.38	500	T	TTC	INS	16	125	17128181	22	60.03	50	0	0	0	GTTGGGCAGTTGGAGATGTCTA	17128305	22	60.09	50	0	0	44.61	GAAGGCATGAGCAGTTTGGAAG
KM_IND_276	chr02	2494450	2494450	1116.76	539	C	CT	INS	16	105	2494449	22	60.09	45.45	0	0	0	GCTTTCCCCCTGTTTTGGTTTT	2494553	22	62.07	54.55	0.27	0.27	35.35	CAGATCAGCGAAAACCTGGCTG
KM_IND_277	chr06	16858305	16858305	2588.66	527	T	TGAG	INS	14	103	16858305	22	59.96	50	0	0	0	TGAGGAGGAAGAAACAGAAGCC	16858407	22	60.09	45.45	26.32	4.61	35.19	GTGCCAAACATGTGATGCATCT
KM_IND_278	chr06	13500956	13500956	2134.05	458	A	AAGG	INS	14	131	13500956	22	60.94	54.55	10.08	10.08	0	AAGGAGCTACTGGACGGTACTC	13501086	22	59.97	45.45	0	0	0	CGACCTCATTGCCAACTTTTGT
KM_IND_279	chr11	5798391	5798391	1617.7	519	A	C	SNP	15	231	5798369	24	60.51	45.83	0	0	34.13	CCAGTCCACTCCAAATTCAGAGAA	5798600	22	59.96	45.45	0	0	33.61	AATTGTTTGAGGCCAAGCTTCC
KM_IND_280	chr10	6160720	6160720	1915.14	590	A	G	SNP	15	141	6160699	23	59.03	43.48	0	0	0	TGTTTCCACTCTCCTCTCAAGAA	6160839	22	60.16	54.55	3.14	0	44.22	GAGAGGAGCGTAGAGACCTACA
KM_IND_281	chr11	5798390	5798390	1546.47	511	G	T	SNP	15	205	5798369	23	59.99	47.83	10.74	0	34.13	CCAGTCCACTCCAAATTCAGAGA	5798573	22	59.77	50	0	0	0	CCAACTTCCTCTTCACATTGCC
KM_IND_282	chr11	3629886	3629886	1346.64	961	C	T	SNP	16	494	3629865	23	60.31	43.48	8.05	0	36.32	GGAATGACTTCAAAGCATTGGCA	3630358	22	60.22	50	0	0	37.08	CAGCAGTTGAAACTTGACCACC
KM_IND_283	chr05	29597062	29597062	658.3	336	T	C	SNP	15	424	29597042	22	60.95	59.09	0	0	0	CTTGAGGTAGAGGAGGAGGGTG	29597466	22	59.96	50	1.23	0	0	CGATAAATCTGCCGGTGGAGTA
KM_IND_284	chr08	27026929	27026929	35.41	310	G	T	SNP	14	196	27026909	22	59.24	50	0	0	44.7	ATTCTACGTCTCCAGGACAAGG	27027104	22	60.09	50	0	0	0	CAGGAAACCCAGCTTCGTCTAT
KM_IND_285	chr12	23949808	23949808	51.67	443	A	T	SNP	14	308	23949788	22	60.22	45.45	11.49	3.26	34.32	TAAGCGCATCCGGATTGTACAT	23950095	22	59.9	45.45	19.48	3.54	0	TTTCTTGTTTCCGGAGCAAACC
KM_IND_286	chr08	9826737	9826737	2340.03	673	C	G	SNP	15	388	9826717	22	59.9	50	0	0	0	GAAGATGCCTGCAAGATCAACC	9827104	22	59.83	50	0	0	45.96	TGATCAGCTTCTTCCTCCGAAG
KM_IND_287	chr06	20498146	20498146	1578.76	476	G	A	SNP	15	238	20498126	22	59.5	45.45	0	0	37.76	CCTTGGTTGACAGGTTTGTTGT	20498363	22	59.58	45.45	0	0	0	AGATAACAACAAGCCATCGTGC
KM_IND_288	chr01	22691814	22691814	607.81	408	C	A	SNP	16	153	22691794	22	59.84	45.45	0	0	0	ATCAAAAATCGAACCACCGTCG	22691946	22	59.37	50	0	0	0	GCTCCTCTCACAGTTATCCGAT
KM_IND_289	chr09	12665633	12665633	1223.81	591	A	G	SNP	16	192	12665613	22	59.64	50	0	0	0	CACAAGACACAACCACCAAGAG	12665824	22	59.9	45.45	0	0	0	TTCAGCGTACAGAGGTTTGGAA
KM_IND_290	chr06	22953300	22953300	511.82	667	T	C	SNP	16	490	22953280	22	59.52	50	0	0	37.56	GCTCTTGGTCAGTGTGTGATTC	22953769	22	59.64	50	0	0	39.48	CCCCATTGAATAGTCGCAAGTG
KM_IND_291	chr11	8842547	8842547	92.72	279	C	A	SNP	15	193	8842529	20	63.93	60	2.19	0	0	AGTGCTCCTGGTTGCCGACT	8842721	21	60	47.62	1.33	0	42.66	TGCGATGACGACGATGATGAT
KM_IND_292	chr12	4093152	4093152	27.75	338	C	T	SNP	15	117	4093134	20	62.12	60	0	0	0	AACCCTTGTACACCTCGCCC	4093250	22	58.75	45.45	0	0	0	TTCGGATGAACTAAGCTGAACG
KM_IND_293	chr06	9127216	9127216	1615.03	796	G	T	SNP	15	104	9127199	19	55.71	52.63	16.05	0	42.56	CTGATTGTACAGCAGGAGC	9127302	23	58.28	43.48	0	0	0	TGTTTAGGGGGACAAGTACAAAG
KM_IND_294	chr01	32336017	32336017	980.03	508	T	G	SNP	16	455	32335995	25	57.58	40	1.81	0.01	41.17	GCAATCCTTCTCATATGAAGTGTAG	32336449	22	59.57	50	0	0	0	TCTGCATGTCATCACTACTCCC
KM_IND_295	chr09	22897788	22897788	853.96	396	G	A	SNP	14	129	22897767	24	60.08	45.83	2.71	0	38.72	CCCATGTTCAATGAGAAACAGGTC	22897895	22	60.22	50	0	0	0	AGGAGTAAAAGTGTTGGGTCGG
KM_IND_296	chr11	5798391	5798391	1617.7	519	A	C	SNP	15	204	5798370	24	58.75	41.67	0	0	33.25	CAGTCCACTCCAAATTCAGAGAAT	5798573	22	59.77	50	0	0	0	CCAACTTCCTCTTCACATTGCC
KM_IND_297	chr10	6160720	6160720	1915.14	590	A	G	SNP	15	139	6160699	24	59.96	45.83	0	0	0	TGTTTCCACTCTCCTCTCAAGAAG	6160840	22	59.9	54.55	0	0	41.38	AGAGAGGAGCGTAGAGACCTAC
KM_IND_298	chr11	5798390	5798390	1546.47	511	G	T	SNP	15	231	5798369	24	60.51	45.83	0	0	34.13	CCAGTCCACTCCAAATTCAGAGAA	5798600	22	59.96	45.45	0	0	33.61	AATTGTTTGAGGCCAAGCTTCC
KM_IND_299	chr11	3629886	3629886	1346.64	961	C	T	SNP	16	494	3629865	24	60.62	41.67	8.05	0	36.32	GGAATGACTTCAAAGCATTGGCAT	3630358	22	60.22	50	0	0	37.08	CAGCAGTTGAAACTTGACCACC
KM_IND_300	chr06	20498146	20498146	1578.76	476	G	A	SNP	15	238	20498126	23	60.06	43.48	0	0	37.76	CCTTGGTTGACAGGTTTGTTGTT	20498363	22	59.58	45.45	0	0	0	AGATAACAACAAGCCATCGTGC
KM_IND_301	chr06	22953300	22953300	511.82	667	T	C	SNP	16	490	22953280	23	60.81	47.83	0	0	37.56	GCTCTTGGTCAGTGTGTGATTCT	22953772	22	60.03	45.45	0	0	0	TGTCCCCATTGAATAGTCGCAA
KM_IND_302	chr06	22953300	22953300	511.82	667	T	C	SNP	16	491	22953280	23	60.81	47.83	0	0	37.56	GCTCTTGGTCAGTGTGTGATTCT	22953770	22	59.76	45.45	0	0	39.48	TCCCCATTGAATAGTCGCAAGT
KM_IND_303	chr11	8531077	8531077	2183.03	669	G	A	SNP	15	413	8531058	22	61.77	45.45	5.77	0	0	TTTTTCACAACAGGGTCGCGTT	8531470	22	59.82	54.55	0	0	39.12	GTAGGGAGAGTACCTGGGATGA
KM_IND_304	chr12	269680	269680	192.07	475	C	A	SNP	15	180	269661	22	59.96	45.45	0	0	0	TCAGGGGCACAAATTAGAGCTT	269843	22	59.91	50	0	0	0	CATGCTTTTCACTCGCCAGTAG
KM_IND_305	chr09	10009923	10009923	928.72	667	G	A	SNP	16	140	10009904	22	56.64	40.91	16.84	2.36	38.7	GGTGAAGAAGTATTTCACAGCA	10010043	22	59.45	45.45	0	0	41.13	CCCATGAAAGTTCAAGCGACTT
KM_IND_306	chr05	29597062	29597062	658.3	336	T	C	SNP	15	434	29597043	22	62.31	59.09	0	0	0	TTGAGGTAGAGGAGGAGGGTGG	29597476	22	59.84	50	6.98	0	44.06	CGATGGCTGTCGATAAATCTGC
KM_IND_307	chr11	23415910	23415910	22.01	371	A	C	SNP	15	369	23415891	22	61.18	50	5.34	0	46.19	ACCGTACGTTGTAGCAAAGAGC	23416259	22	60.09	45.45	0	0	0	AATTCGCCAATGTTCCCCAATG
KM_IND_308	chr06	13694464	13694464	1843.14	539	A	G	SNP	15	214	13694445	22	60.68	50	9.56	0	0	ATCAAACTCATACCCTGGCAGC	13694658	22	59.84	50	0	0	43.26	GGCTGTAGCGATAATCTCCGAT
KM_IND_309	chr08	27026929	27026929	35.41	310	G	T	SNP	14	195	27026910	22	61.72	54.55	0	0	44.7	TTCTACGTCTCCAGGACAAGGC	27027104	22	60.09	50	0	0	0	CAGGAAACCCAGCTTCGTCTAT
KM_IND_310	chr08	8391269	8391269	1004.86	477	C	T	SNP	14	321	8391250	22	59.64	45.45	0	0	0	CACAAAGCACATCAAAGGACCA	8391570	22	60.16	50	0	0	0	TCCTGTGCAGCTCCATTATCAG
KM_IND_311	chr05	28554930	28554930	1122.99	675	C	T	SNP	16	247	28554911	22	59.9	50	1.09	1.09	0	CAAACATCAGCTGGCTCATCTG	28555157	22	59.84	50	5.57	0	37.93	CTGCAGGCTGTTATTGACAAGG
KM_IND_312	chr01	22691814	22691814	607.81	408	C	A	SNP	16	148	22691796	21	60.4	52.38	10.48	10.48	0	CAAAAATCGAACCACCGTCGG	22691943	22	60.55	54.55	0	0	0	CCTCTCACAGTTATCCGATGGC
KM_IND_313	chr11	1647276	1647276	1972.27	579	G	C	SNP	15	115	1647258	21	60.14	52.38	0	0	0	CATTGAGGAACATGTGTGGCG	1647372	22	59.83	54.55	0	0	34.08	CTCACTGAAGAGGACCTGATGG
KM_IND_314	chr11	1647276	1647276	1972.27	579	G	C	SNP	15	304	1647258	21	60.14	52.38	0	0	0	CATTGAGGAACATGTGTGGCG	1647560	22	59.96	50	0	0	0	TCCCCACCAAGATTAACAAGGG
KM_IND_315	chr12	19732490	19732490	235.85	484	C	T	SNP	14	239	19732472	21	60	52.38	12.43	0	43.9	TGACAAGTGTCTGGTCATCGG	19732710	22	59.84	50	0	0	40.01	CTCTCAGCCAATCGGGAAAAAC
KM_IND_316	chr04	31648893	31648893	30.97	346	G	A	SNP	16	391	31648876	20	61.08	60	0	0	42.24	CTGAACGTGAGCCGGATGTC	31649266	22	60.35	50	0	0	0	TAGCCCAAACGAACTCTCATGG
KM_IND_317	chr04	31648893	31648893	30.97	346	G	A	SNP	16	401	31648876	20	61.08	60	0	0	42.24	CTGAACGTGAGCCGGATGTC	31649276	22	59.76	45.45	0	0	33.15	AATGGACTGATAGCCCAAACGA
KM_IND_318	chr11	5798391	5798391	1617.7	519	A	C	SNP	15	204	5798370	25	59.29	40	0	0	43.07	CAGTCCACTCCAAATTCAGAGAATT	5798573	22	59.77	50	0	0	0	CCAACTTCCTCTTCACATTGCC
KM_IND_319	chr11	5798390	5798390	1546.47	511	G	T	SNP	15	204	5798370	24	58.75	41.67	0	0	33.25	CAGTCCACTCCAAATTCAGAGAAT	5798573	22	59.77	50	0	0	0	CCAACTTCCTCTTCACATTGCC
KM_IND_320	chr03	20843882	20843882	1160.81	662	C	T	SNP	16	195	20843862	24	60.02	41.67	0	0	37.43	CGAGTGAATTGAAGAAAGCACTGT	20844056	22	59.77	45.45	8	0	37.28	CCTATGCATGGTTTGGTTGCTT
KM_IND_321	chr01	32356614	32356614	902.81	530	G	A	SNP	16	160	32356595	23	59.49	43.48	0	0	39.25	TGTGTTGATTCCAATGAAGGAGC	32356754	22	59.76	45.45	0	0	31.99	TTTTCTGCTCCGAAGATGGGAT
KM_IND_322	chr12	19733276	19733276	96.89	448	T	C	SNP	14	380	19733258	22	59.96	45.45	4.36	0	0	GCTCCCAGGTTTGCAATCTTTT	19733637	22	60.22	45.45	0.82	0	0	AGCAACAGATAGTGCAGTGGTT
KM_IND_323	chr11	23336261	23336261	98.17	396	C	G	SNP	14	462	23336243	22	60.09	54.55	23.2	12.31	31.93	GAGGAAGCTTAAGTCCCTCACC	23336703	22	59.97	45.45	9.54	7.58	39.63	TTGCCTCCGAAAGCTTTTCAAG
KM_IND_324	chr11	23336261	23336261	98.17	396	C	G	SNP	14	427	23336243	22	60.09	54.55	23.2	12.31	31.93	GAGGAAGCTTAAGTCCCTCACC	23336669	22	60.09	50	0	0	0	TGAAGGAACACTCATCTCGCTC
KM_IND_325	chr11	23415729	23415729	24.6	373	A	G	SNP	15	257	23415711	22	61.51	50	0	0	0	GAACAACATCCTCCGGCGAATT	23415967	22	60.09	50	0	0	0	GAGCGAGATGAGTGTTCCTTCA
KM_IND_326	chr12	23949812	23949812	51.67	445	A	C	SNP	14	184	23949794	22	60.29	50	9.88	0	0	CATCCGGATTGTACATGCAACG	23949977	22	59.9	45.45	0	0	36.8	AAAGAGTGGCTTGCTTTGTTCC
KM_IND_327	chr11	23336638	23336638	32.5	384	C	T	SNP	16	483	23336620	22	60.35	45.45	19.93	0.8	0	TTCGACTGAATCTGTACGCGTT	23337102	22	60.03	45.45	3.44	0	34.49	CTGCGGCAACAAGTAATTGACA
KM_IND_328	chr09	11389662	11389662	24.87	282	T	C	SNP	15	304	11389644	22	58.52	45.45	0	0	41.77	ATGTATATGAGGTGCCAGTTGC	11389946	22	59.96	45.45	6.24	0	42.51	TGGCAACGAGTGAGATGTTGTA
KM_IND_329	chr08	15889585	15889585	2320.04	657	C	T	SNP	15	201	15889567	22	60.29	50	3.79	0	37.56	CTTCATGATGAATGTCCGCGTG	15889767	22	60.29	45.45	0	0	34.61	AGATCCTTGCGAACAATGTCCA
KM_IND_330	chr08	15889585	15889585	2320.04	657	C	T	SNP	15	200	15889567	22	60.29	50	3.79	0	37.56	CTTCATGATGAATGTCCGCGTG	15889766	22	59.9	50	0	0	34.61	GATCCTTGCGAACAATGTCCAG
KM_IND_331	chr11	19953299	19953299	53.31	301	C	A	SNP	14	197	19953281	22	60.99	54.55	0	0	42.21	GTGATGTCGTTCTACCAGCAGG	19953478	22	60.03	50	0	0	0	GGAATTAGAAGAGGCACCCACA
KM_IND_332	chr05	15464806	15464806	81.38	317	G	A	SNP	14	184	15464788	22	59.9	50	0	0	0	CATTGTTCAGGCCATAGTGCAG	15464971	22	60.22	45.45	0	0	0	AACTCATTACAAGACACCGCCA
KM_IND_333	chr12	23950780	23950780	3233.06	482	A	C	SNP	15	358	23950762	22	60.22	50	9.88	0	0	CATCCGGATTGTACTTGCAACG	23951119	22	59.89	45.45	7.55	0	0	TGTCACCAGCCAAGAATTCTGA
KM_IND_334	chr01	32349273	32349273	667.9	371	C	T	SNP	16	201	32349255	22	59.97	45.45	22.31	9.87	32.39	CAAGCTTGATATCCATTGCGCA	32349455	22	60.16	50	0	0	37.12	CATCGTCTGTAACAGCAGGGAT
KM_IND_335	chr12	16709372	16709372	794.81	660	C	T	SNP	16	446	16709354	22	59.83	50	0	0	32.87	TCCCTTAGTCTGCATTACCAGC	16709799	22	60.22	45.45	6.7	3.02	38.69	CACATTCCATTTTGTGTGGCCA
KM_IND_336	chr05	28554930	28554930	1122.99	675	C	T	SNP	16	246	28554912	22	60.29	45.45	6.11	0	30.73	AAACATCAGCTGGCTCATCTGT	28555157	22	59.84	50	5.57	0	37.93	CTGCAGGCTGTTATTGACAAGG
KM_IND_337	chr11	1647276	1647276	1972.27	579	G	C	SNP	15	303	1647259	21	61.82	52.38	0	0	0	ATTGAGGAACATGTGTGGCGC	1647560	22	59.96	50	0	0	0	TCCCCACCAAGATTAACAAGGG
KM_IND_338	chr11	20478660	20478660	855.66	459	C	G	SNP	16	276	20478643	21	59.54	52.38	0	0	0	GTCTTCATGTGGTGCTTCGTC	20478918	22	60.29	50	0	0	39.53	GCCTCAGCACTACACAAGAAGA
KM_IND_339	chr01	22691814	22691814	607.81	408	C	A	SNP	16	415	22691797	21	62.06	52.38	12.28	0	0	AAAAATCGAACCACCGTCGGC	22692210	22	59.7	54.55	0	0	0	GCCATCTCCTTCTCTCCATCTC
KM_IND_340	chr07	10818925	10818925	1352.81	695	A	G	SNP	16	283	10818908	21	61.37	52.38	26.36	26.36	41.27	CCCAGCTTGGAAACTGCAGTT	10819190	22	59.64	45.45	24.92	20.89	46.51	ATTTGTGGAACTGACAGTTGCC
KM_IND_341	chr11	6147827	6147827	1045.03	437	C	G	SNP	15	337	6147811	20	64.26	60	5.42	0	45.94	TTGCCTGCACGTAGCTCCCA	6148147	21	59.86	57.14	0	0	0	GGAAGAAGAGGAGGGATGCAG
KM_IND_342	chr04	31648893	31648893	30.97	346	G	A	SNP	16	500	31648877	20	62.81	60	10.78	10.78	42.24	TGAACGTGAGCCGGATGTCG	31649376	22	59.51	50	0	0	35.88	GAGTTGAGACTTGAGACGGGAT
KM_IND_343	chr11	3629886	3629886	1346.64	961	C	T	SNP	16	174	3629883	25	59.76	40	27.22	0	39.46	TGGCATATAAATTCATGCCAAGAGG	3630038	22	60.03	50	0	0	37.19	GACTGTGGTGTAGGTATGCCAA
KM_IND_344	chr06	10409513	10409513	129.83	443	G	A	SNP	15	259	10409511	24	59.96	41.67	0	0	45.45	TAGCTATTTTTGGTGACAGACCCA	10409769	22	60.22	50	0	0	0	GGTAGTGCTGCAATGTATGTGC
KM_IND_345	chr09	10009923	10009923	928.72	667	G	A	SNP	16	483	10009921	24	59.5	45.83	0	0	0	CAGCAATATATCGAGGATTACGCC	10010403	22	60.36	45.45	0	0	0	AAATGACTGGCTCCATAACGCT
KM_IND_346	chr08	27026167	27026167	716.32	405	T	C	SNP	15	185	27026165	25	60.16	44	12.42	12.42	0	TCTCTAAGAGGATCTGCAACAATCC	27026349	22	60.09	50	0	0	36.97	CAGCTTCTGGTGTCATCCTCAT
KM_IND_347	chr07	11847651	11847651	979.82	678	A	T	SNP	16	346	11847649	25	56.59	40	0	0	0	CTACATTGATCTCCTAGAAAGCTAC	11847994	22	59.9	50	0	0	0	CTTGCACAGCCCATCAATTAGG
KM_IND_348	chr06	10409513	10409513	129.83	443	G	A	SNP	15	258	10409512	23	60.18	43.48	0	0	45.45	AGCTATTTTTGGTGACAGACCCA	10409769	22	60.22	50	0	0	0	GGTAGTGCTGCAATGTATGTGC
KM_IND_349	chr10	9915220	9915220	2490.03	621	A	G	SNP	15	160	9915219	24	59.61	45.83	0	0	45.46	CACTTCTTAGTGTCTGCATTCAGG	9915378	22	60.22	45.45	7.75	7.75	35.05	ATTTGGTTGCTTTTCCAGGCTG
KM_IND_350	chr08	27026167	27026167	716.32	405	T	C	SNP	15	184	27026166	24	58.94	45.83	12.42	12.42	0	CTCTAAGAGGATCTGCAACAATCC	27026349	22	60.09	50	0	0	36.97	CAGCTTCTGGTGTCATCCTCAT
KM_IND_351	chr08	26991619	26991619	116.9	511	T	C	SNP	15	163	26991618	24	60.08	41.67	25.18	0	41.93	ATGACGTCATCAAACTGCTTTCTG	26991780	22	60.16	50	0	0	0	CGCAATACAGTTACCCAAGCAC
KM_IND_352	chr09	10009923	10009923	928.72	667	G	A	SNP	16	482	10009922	24	59.84	41.67	0	0	0	AGCAATATATCGAGGATTACGCCA	10010403	22	60.36	45.45	0	0	0	AAATGACTGGCTCCATAACGCT
KM_IND_353	chr09	10009923	10009923	928.72	667	G	A	SNP	16	484	10009922	24	59.84	41.67	0	0	0	AGCAATATATCGAGGATTACGCCA	10010405	22	59.64	50	0	0	0	CCAAATGACTGGCTCCATAACG
KM_IND_354	chr08	10142673	10142673	1293.63	564	T	C	SNP	14	315	10142672	25	60.28	40	2.87	0	0	ATAAATTGATGGATCTGCAAGCGTC	10142986	22	60.16	50	0	0	0	GTTGCACTCATGGCAGGTATTG
KM_IND_355	chr06	10409513	10409513	129.83	443	G	A	SNP	15	247	10409513	22	58.85	45.45	0	0	45.45	GCTATTTTTGGTGACAGACCCA	10409759	22	59.9	45.45	0	0	41.91	CAATGTATGTGCTCGGCATGTT
KM_IND_356	chr12	17709824	17709824	157.57	408	T	C	SNP	14	335	17709824	22	60.09	45.45	0	0	36.8	TGGAAGTGGAAATGTGTCCCAA	17710158	22	59.76	45.45	0	0	36.08	AGCAAATTGGGCGACTACTAGT
KM_IND_357	chr03	21507550	21507550	1729.13	684	G	A	SNP	15	132	21507550	22	60.09	50	4.72	0	0	GTCCCATCATGTTGAGGCAAAC	21507680	22	59.89	45.45	15.13	0	35.15	AAAGATGGTCCTTTCTGCAGGT
KM_IND_358	chr09	22897788	22897788	853.96	396	G	A	SNP	14	108	22897788	22	59.4	50	0	0	34.86	GTCAGTAGTAATCTGTGCGTGC	22897895	22	60.22	50	0	0	0	AGGAGTAAAAGTGTTGGGTCGG
KM_IND_359	chr03	36043479	36043479	1022.81	521	T	C	SNP	16	469	36043479	22	61.39	50	5.81	5.81	40.23	TGCAAACATGCAGGTGTACTCC	36043947	22	59.19	45.45	0	0	0	GTACGTGACTCCTTTTTGCCAT
KM_IND_360	chr02	1956109	1956109	550.82	369	C	T	SNP	16	475	1956109	22	61.13	54.55	8.12	0	0	CGGACTCTGATATCTCGCTCCA	1956583	22	59.89	45.45	0	0	35.21	TGACCACCACAGTCTTATTGCA
KM_IND_361	chr07	12802164	12802164	1036.81	677	G	T	SNP	16	384	12802164	22	56.48	40.91	12.41	12.41	34.27	GTACAACATTTTCATGGCCTTG	12802547	22	60.22	50	0	0	0	AATGCCTCCTAACAGATACGGC
KM_IND_362	chr03	18889381	18889381	1268.97	673	T	C	SNP	16	370	18889381	22	57.43	40.91	3.62	0	0	TGGCTTACAGATGTTACCATGT	18889750	22	59.95	50	0	0	37.85	TGGATACTCCCCACCCTTAACT
KM_IND_363	chr09	2010093	2010093	1595.81	699	G	C	SNP	16	202	2010093	22	60.03	50	15.4	0	43.03	GACTTCCGAAGTGTTGGAGGAT	2010294	22	60.16	45.45	0	0	0	CACATTTGCTCGTTGATGCGTA
KM_IND_364	chr08	26991619	26991619	116.9	511	T	C	SNP	15	162	26991619	23	59.75	43.48	20.29	0	33.02	TGACGTCATCAAACTGCTTTCTG	26991780	22	60.16	50	0	0	0	CGCAATACAGTTACCCAAGCAC
KM_IND_365	chr07	10758791	10758791	1138.97	684	G	C	SNP	16	284	10758791	23	60.06	47.83	8.58	2.28	0	GAAACAATTGTACCGGTGGAAGG	10759067	22	60.22	50	12.16	0	39.39	TACGTTACCACATACCGGATGC
KM_IND_366	chr10	9057365	9057365	1895.03	573	G	A	SNP	15	101	9057365	24	59.9	50	10.72	7.09	38.49	GGAGATGAGTACTGAAGGAACTCC	9057465	22	59.89	45.45	0	0	36.59	AGAAGTCATTGTTGGCTGGAGT
KM_IND_367	chr10	9915220	9915220	2490.03	621	A	G	SNP	15	159	9915220	24	59.96	41.67	0	0	35.66	ACTTCTTAGTGTCTGCATTCAGGT	9915378	22	60.22	45.45	7.75	7.75	35.05	ATTTGGTTGCTTTTCCAGGCTG
KM_IND_368	chr08	27026167	27026167	716.32	405	T	C	SNP	15	183	27026167	24	59.28	41.67	18.7	18.7	35.62	TCTAAGAGGATCTGCAACAATCCT	27026349	22	60.09	50	0	0	36.97	CAGCTTCTGGTGTCATCCTCAT
KM_IND_369	chr08	10142673	10142673	1293.63	564	T	C	SNP	14	314	10142673	24	59.96	41.67	2.87	0	0	TAAATTGATGGATCTGCAAGCGTC	10142986	22	60.16	50	0	0	0	GTTGCACTCATGGCAGGTATTG
KM_IND_370	chr03	9949615	9949615	54.09	75	T	G	SNP	15	199	9949615	25	60.39	40	6.27	0	41.88	TTCAAGATTGAATGAGGCATTTCCG	9949813	22	59.9	50	0	0	0	AGGTTGAGACTTGACAGGTGAC
